# Supplementary material for: Impact of General Practitioner Education on Acceptance of an Adjuvanted Seasonal Influenza Vaccine among Older Adults in England
Source: MDPI journal article supplement (doi:10.3390/bs13020130), 2023-02-02
Supplement: s1 [file s1]

**Figure S1.** General practitioners' (GPs) responses to knowledge-based questions before and after participating in an accredited continuing medical education (CME) program.

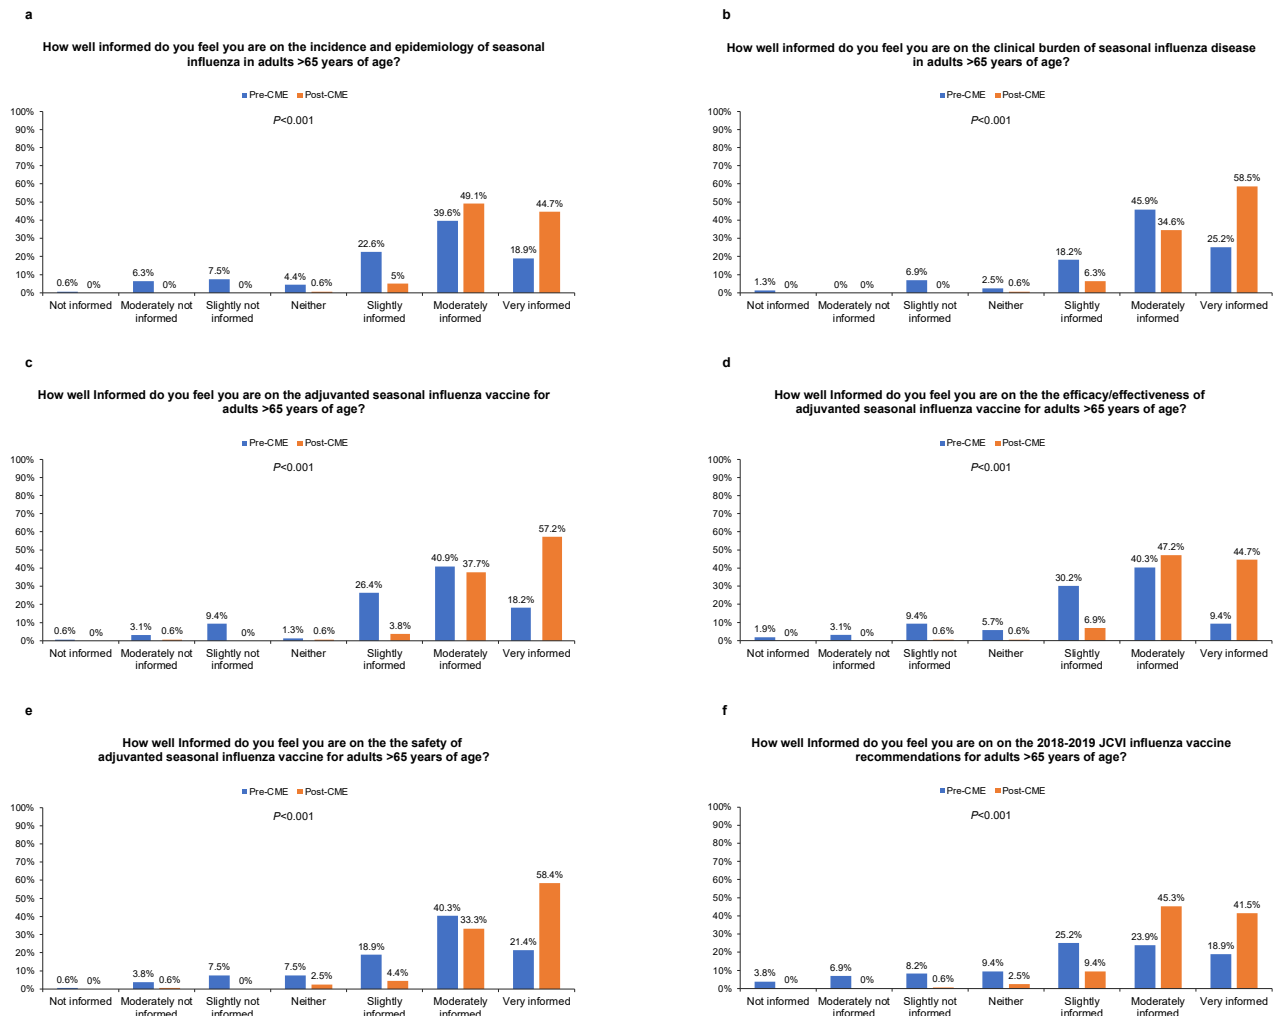

**Figure S2.** General practitioners' level of confidence in the safety (a) and efficacy/effectiveness (b) of adjuvanted trivalent influenza vaccine (aTIV) for adults >65 years of age before and after participating in an accredited continuing medical education (CME) program.

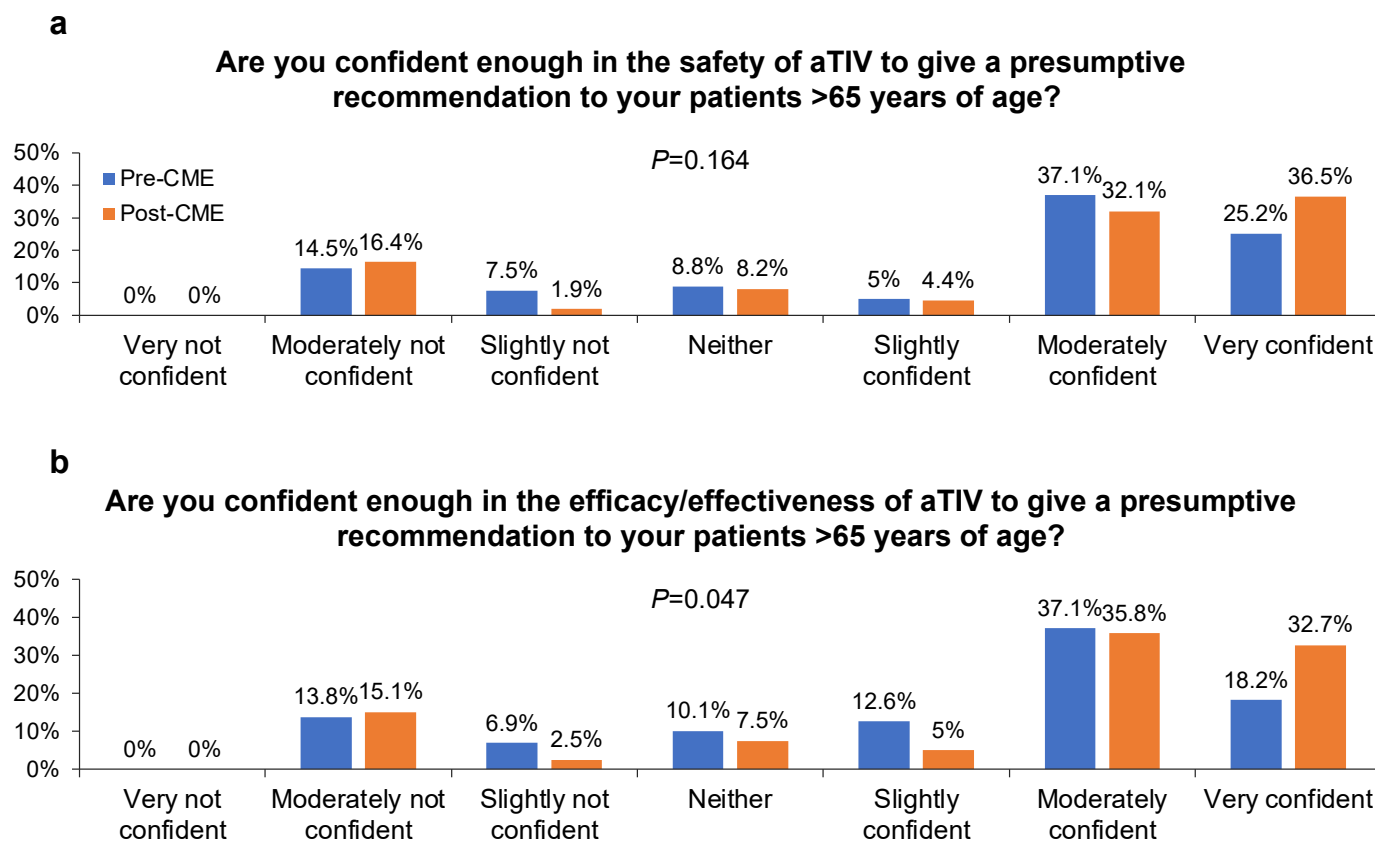

**Figure S3.** General practitioners' responses to the statement, "Presumptively recommending adjuvanted seasonal influenza vaccine (aTIV) to all of my older adult patients (>65 years of age) in whom influenza vaccination is not contraindicated would be": (a) bad or good, (b) foolish or wise, (c) ineffective or effective, (d) dangerous or safe, (e) unimportant or important, (f) a waste of time or not a waste of time.

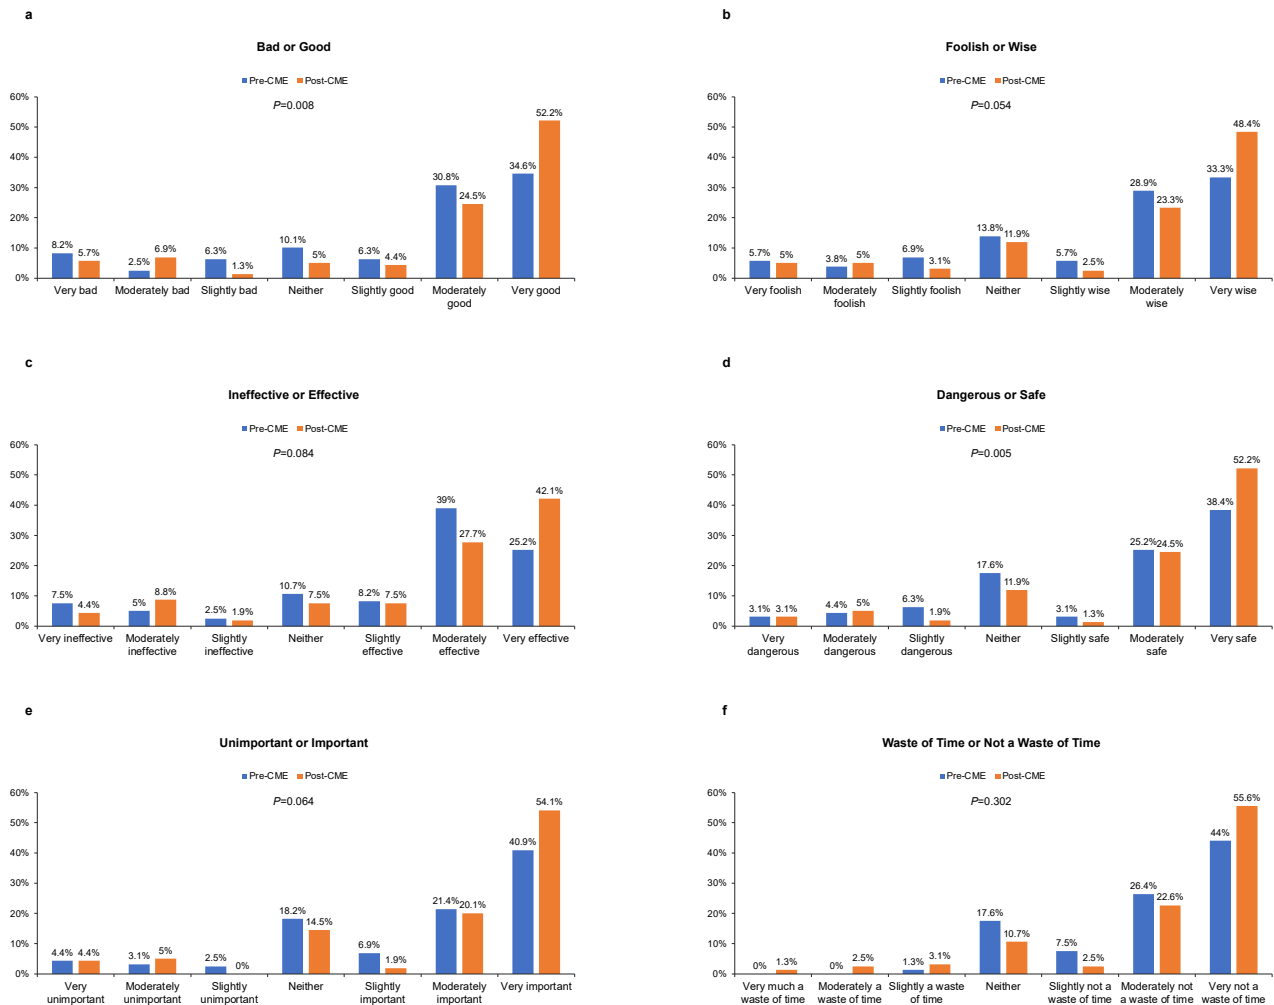

**Figure S4.** Patients’ responses to the statement, “Getting a flu vaccine would be”: (a) bad or good, (b) foolish or wise, (c) unimportant or important.

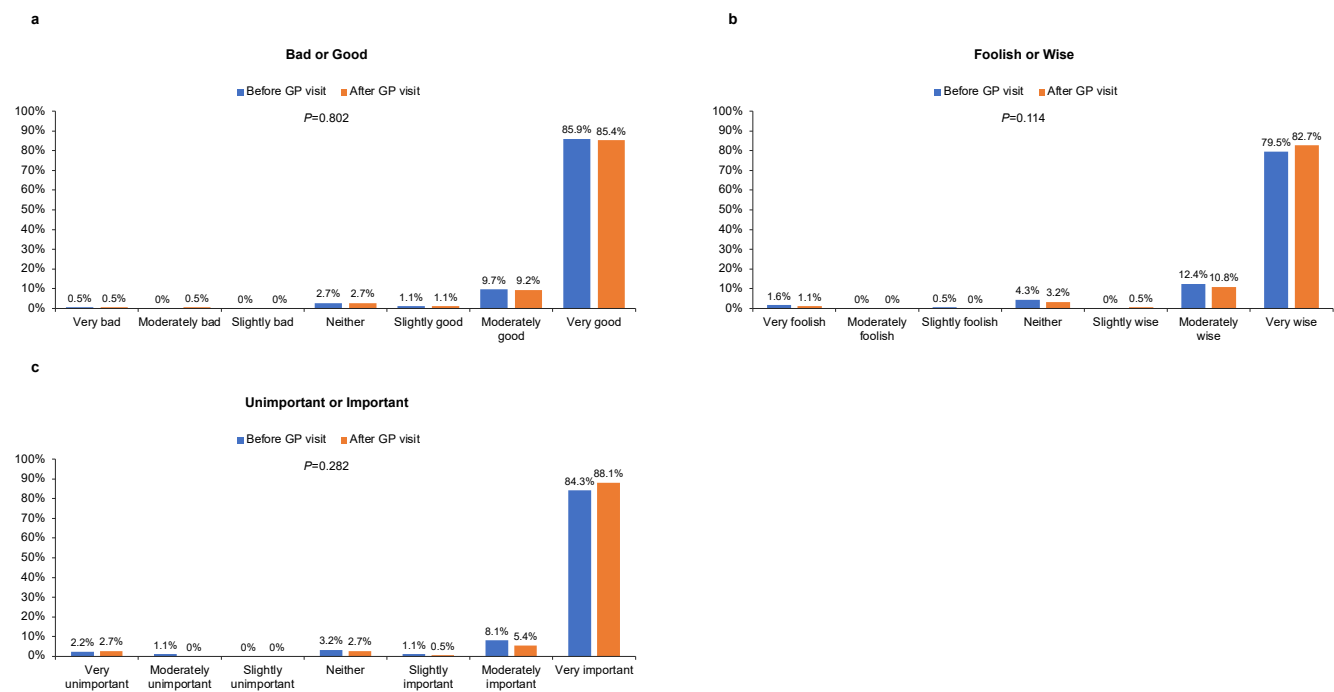

**Table S1.** Reasons reported by general practitioners (n = 12) for not presumptively recommending adjuvanted trivalent influenza vaccine (aTIV) or not administering aTIV to patient participants >65 years of age.

| <b>Reason</b>                                  | <b>Patient participants, n (%)</b> |
|------------------------------------------------|------------------------------------|
| <b>No presumptive recommendation</b>           | <b>n=53</b>                        |
| Already had influenza vaccine                  | 17 (32.1)                          |
| Consent                                        | 8 (15.1)                           |
| Retrospective study (i.e., already vaccinated) | 20 (37.7)                          |
| Carer or family member refused consent         | 1 (1.9)                            |
| Influenza season over                          | 1 (1.9)                            |
| Other                                          | 6 (11.3)                           |
| <b>No aTIV vaccination</b>                     | <b>n=22</b>                        |
| Already had influenza vaccine                  | 15 (68.2)                          |
| Declined/no consent                            | 4 (18.2)                           |
| Other                                          | 3 (13.6)                           |

**Table S2.** Association of attitudes and social norms with the intention to vaccinate and vaccination with aTIV.<sup>1</sup>

|                                               | <b>B</b> | <b>SE</b> | <b>Wald</b> | <b>df</b> | <b>Sig.<br/>(P value)</b> | <b>Odds ratio<br/>(95% CI)</b> |
|-----------------------------------------------|----------|-----------|-------------|-----------|---------------------------|--------------------------------|
| <b>Intention to vaccinate before GP visit</b> |          |           |             |           |                           |                                |
| Bad/good                                      | 2.670    | 0.698     | 14.609      | 1         | 0.000                     | 14.437 (3.672-56.758)          |
| GP doesn't<br>support/support                 | 0.524    | 0.309     | 2.873       | 1         | 0.090                     | 1.688 (0.921-3.094)            |
| Constant                                      | -16.699  | 4.688     | 12.686      | 1         | 0.000                     | 0.000                          |
| <b>Vaccination with aTIV</b>                  |          |           |             |           |                           |                                |
| Age (years)                                   | 0.169    | 0.082     | 4.253       | 1         | 0.039                     | 1.185 (1.008-1.391)            |
| Foolish/wise                                  | 1.652    | 0.389     | 18.018      | 1         | 0.000                     | 5.219 (2.434-11.193)           |
| Constant                                      | -19.790  | 7.252     | 7.446       | 1         | 0.006                     | 0.000                          |

aTIV, adjuvanted trivalent influenza vaccine; B, coefficient for the constant; df, degrees of freedom; GP, general practitioner (health care provider or physician); SE, standard error; Sig., significance. <sup>1</sup>Variable(s) entered in initial model: age (years), education level, income level, bad/good, foolish/wise, ineffective/effective, dangerous/safe, unimportant/important, important people don't support/support, GP doesn't support/supports. Final model presented upon backward selection using the Wald method.

**Table S3.** Responses to open-ended patient questions answered prior to a visit with healthcare provider/physician (each row represents a different patient's response).

| <b>What do you know about seasonal flu infection?</b>                                                             | <b>What do you know about seasonal flu vaccination?</b>                               | <b>Last winter, did you get a seasonal flu vaccine?</b> | <b>Why?</b>                                                                           | <b>This current winter, will you get a seasonal flu vaccine?</b> | <b>Why?</b>                                                                               |
|-------------------------------------------------------------------------------------------------------------------|---------------------------------------------------------------------------------------|---------------------------------------------------------|---------------------------------------------------------------------------------------|------------------------------------------------------------------|-------------------------------------------------------------------------------------------|
| Nothing                                                                                                           | No                                                                                    | YES                                                     | Because it's a good thing. Offered something that can help me                         | YES                                                              | [Nothing written]                                                                         |
| During winter flu is common and in vulnerable people it can be fatal                                              | Covers some of the flu viruses likely to be circulating                               | YES                                                     | Flu prevention                                                                        | YES                                                              | Flu prevention                                                                            |
| Can make you very ill                                                                                             | A difference in age vaccine                                                           | YES                                                     | Because I take immunosuppressants                                                     | YES                                                              | I'm old and ill                                                                           |
| Only symptoms                                                                                                     | No                                                                                    | YES                                                     | [Nothing written]                                                                     | YES                                                              | [Nothing written]                                                                         |
| Dangerous to elderly/ill/previous probs children                                                                  | No                                                                                    | YES                                                     | [Nothing written]                                                                     | YES                                                              | [Nothing written]                                                                         |
| No                                                                                                                | No                                                                                    | YES                                                     | Important                                                                             | YES                                                              | [Nothing written]                                                                         |
| No                                                                                                                | No                                                                                    | YES                                                     | Because I was sent for                                                                | YES                                                              | [Nothing written]                                                                         |
| Not good for older/young people                                                                                   | Apparently works                                                                      | YES                                                     | [Nothing written]                                                                     | YES                                                              | Apparently works                                                                          |
| Feverish. Aches and pains. Different from a cold                                                                  | No                                                                                    | YES                                                     | Sensible                                                                              | YES                                                              | [Nothing written]                                                                         |
| A one-off strain                                                                                                  | Specific for strain of flu                                                            | YES                                                     | Flu is dangerous over '65'                                                            | YES                                                              | I don't want to get flu                                                                   |
| Nothing                                                                                                           | It is given to a certain group of people who need extra help to avoid getting the flu | YES                                                     | Advised by practice nurse                                                             | YES                                                              | To give me the best chance of avoiding flu                                                |
| If you are not healthy it can be very detrimental to your health and even kill                                    | Nothing!                                                                              | YES                                                     | My husband is disabled after a stroke and he strongly advised me to take it and my GP | YES                                                              | Because I love and respect my husband and family. I need to be healthy to look after them |
| Good for senior adults. Less likely to get infections                                                             | [Nothing written]                                                                     | YES                                                     | Scheduled                                                                             | YES                                                              | Well managed by surgery                                                                   |
| Not good for you if not                                                                                           | Prevent flu infection                                                                 | YES                                                     | [Nothing written]                                                                     | YES                                                              | [Nothing written]                                                                         |
| Each year NHS and others select what they think will be the most likely (dominant) flu strain and select vaccines | This is the selected vaccine for the dominant flu strain                              | YES                                                     | To avoid catching flu                                                                 | YES                                                              | To stop catching flu                                                                      |

| What do you know about seasonal flu infection?                                                    | What do you know about seasonal flu vaccination?                             | Last winter, did you get a seasonal flu vaccine? | Why?                                                                                | This current winter, will you get a seasonal flu vaccine? | Why?                                               |
|---------------------------------------------------------------------------------------------------|------------------------------------------------------------------------------|--------------------------------------------------|-------------------------------------------------------------------------------------|-----------------------------------------------------------|----------------------------------------------------|
| appropriate for its treatment                                                                     |                                                                              |                                                  |                                                                                     |                                                           |                                                    |
| Not a lot                                                                                         | Not a lot                                                                    | YES                                              | Doctors advise                                                                      | YES                                                       | Doctors advise                                     |
| Can affect patients' health badly                                                                 | Helps to avoid complications from flu infection                              | YES                                              | Good for you                                                                        | YES                                                       | Good for you                                       |
| Can be dangerous to people with diabetes                                                          | Protects against flu infection                                               | YES                                              | [Nothing written]                                                                   | YES                                                       | [Nothing written]                                  |
| [Nothing written]                                                                                 | [Nothing written]                                                            | YES                                              | Recommended by practice                                                             | YES                                                       | [Nothing written]                                  |
| [Nothing written]                                                                                 | [Nothing written]                                                            | YES                                              | [Nothing written]                                                                   | YES                                                       | [Nothing written]                                  |
| Helps to combat the flu could help to resist any other illness                                    | Helps to combat the flu could help to resist any other illness               | YES                                              | Flue can be fatal [illegible] in the elderly                                        | YES                                                       | Flue can be fatal[illegible] in the elderly        |
| Can be dangerous if not done to older people                                                      | Older people can feel the benefit                                            | YES                                              | Health wise                                                                         | YES                                                       | I feel the benefit                                 |
| Annual occurrence                                                                                 | Necessary                                                                    | YES                                              | [Nothing written]                                                                   | YES                                                       | [Nothing written]                                  |
| Flu vac only effective against target strain - I have suffered from a flu- like virus this winter | Harmless and effective against selected strains of flu                       | YES                                              | Flu is a very unpleasant, sometimes dangerous infection therefore avoid if possible | YES                                                       | I have had pneumonia twice in one year             |
| Old people are more vulnerable                                                                    | Doctor gives it to old people                                                | YES                                              | [Nothing written]                                                                   | YES                                                       | [Nothing written]                                  |
| Makes one feel miserable and lethargic                                                            | Wards off the infection or at least minimizes the risk                       | YES                                              | Doctor recommends annual flu shot. Have had shots for many years                    | YES                                                       | Wards off the infection or at least minimizes risk |
| An infectious disease of the respiratory system [illegible] occurring in winter                   | To protect against diseases during the winter season                         | YES                                              | Common sense                                                                        | YES                                                       | Prevent illness                                    |
| Protects against getting full blown flu                                                           | Protects against getting full blown flu                                      | YES                                              | Protection against flu                                                              | YES                                                       | Protection against flu                             |
| It may kill me                                                                                    | To protect against flu and any other health issues I may have                | YES                                              | To protect me thru winter                                                           | YES                                                       | I feel safer having it as I need to keep well      |
| Not a lot! Each season the flu infection varies slightly so making a vaccine against a            | Vaccine is grown in egg [illegible] to be effective against a predicted type | YES                                              | I think it has some effect                                                          | YES                                                       | I think it has some effect                         |



| What do you know about seasonal flu infection?                                                                                            | What do you know about seasonal flu vaccination?                                                                                                           | Last winter, did you get a seasonal flu vaccine? | Why?                                                                                                  | This current winter, will you get a seasonal flu vaccine? | Why?                                                                                                          |
|-------------------------------------------------------------------------------------------------------------------------------------------|------------------------------------------------------------------------------------------------------------------------------------------------------------|--------------------------------------------------|-------------------------------------------------------------------------------------------------------|-----------------------------------------------------------|---------------------------------------------------------------------------------------------------------------|
| predicted type is a little uncertain                                                                                                      |                                                                                                                                                            |                                                  |                                                                                                       |                                                           |                                                                                                               |
| It sometimes gets bad press but myself and family have never had bad side effects                                                         | [Nothing written]                                                                                                                                          | YES                                              | Sensible to have it                                                                                   | YES                                                       | [Nothing written]                                                                                             |
| It can be very debilitating                                                                                                               | Nothing other than the advice given by the doctor                                                                                                          | YES                                              | On the advice of my doctor                                                                            | YES                                                       | I have had the 'flu shot for the last few years and have found it very helpful                                |
| Each year the flu strain changes and certain strains can kill especially the young and elderly so anything that can help can only be good | The WHO monitor all around the world to see which strain is most likely to be around culture the vaccine to make the best effective flu shot for that year | YES                                              | I am diabetic and aged 70yrs and have been getting it yearly since I was first given it in about 2000 | YES                                                       | Because in all the time that I have been getting the flu jab I have only had flu once and that wasn't too bad |
| Causes ill health                                                                                                                         | Prevents flu                                                                                                                                               | YES                                              | Prevents flu                                                                                          | YES                                                       | Prevents flu                                                                                                  |
| Prevents some types                                                                                                                       | Prevents some types                                                                                                                                        | YES                                              | [Nothing written]                                                                                     | YES                                                       | [Nothing written]                                                                                             |
| It can be a killer                                                                                                                        | [Nothing written]                                                                                                                                          | YES                                              | Have it every year                                                                                    | YES                                                       | [Nothing written]                                                                                             |
| Most people get it but I don't think I've ever had it                                                                                     | It is supposed to stop you getting flu                                                                                                                     | YES                                              | Because I was told at the surgery I should have it                                                    | Not specified                                             | Not sure                                                                                                      |
| [Nothing written]                                                                                                                         | [Nothing written]                                                                                                                                          | YES                                              | It was advised                                                                                        | YES                                                       | [Nothing written]                                                                                             |
| Can be dangerous to older people                                                                                                          | Have been encouraged to have it                                                                                                                            | YES                                              | Encouraged by GP                                                                                      | YES                                                       | Seems sensible to avoid flue if possible                                                                      |
| [Nothing written]                                                                                                                         | That it is important to have                                                                                                                               | YES                                              | [Nothing written]                                                                                     | YES                                                       | [Nothing written]                                                                                             |
| If you have the injection, your chances of getting flu is very low indeed                                                                 | Nothing                                                                                                                                                    | YES                                              | I am a Type 2 diabetic, I have had the flu jab at least 16 years                                      | YES                                                       | I get sent an appointment from my doctors                                                                     |
| It is extremely debilitating and the person becomes very ill                                                                              | It only takes a few seconds                                                                                                                                | YES                                              | To be prepared                                                                                        | YES                                                       | To be prepared                                                                                                |
| [Nothing written]                                                                                                                         | [Nothing written]                                                                                                                                          | YES                                              | To hopefully prevent me from getting flu                                                              | YES                                                       | To continue to help prevent me from getting flu                                                               |
| Very bad for elderly and or various health problems                                                                                       | Hopefully should protect against the worst outbreaks                                                                                                       | YES                                              | [illegible] with heart problems (have fid def pacemaker)                                              | YES                                                       | [illegible] with heart problems (have fid def pacemaker)                                                      |

| What do you know about seasonal flu infection?                                              | What do you know about seasonal flu vaccination?                                | Last winter, did you get a seasonal flu vaccine? | Why?                                                                                                   | This current winter, will you get a seasonal flu vaccine? | Why?                                                                                                   |
|---------------------------------------------------------------------------------------------|---------------------------------------------------------------------------------|--------------------------------------------------|--------------------------------------------------------------------------------------------------------|-----------------------------------------------------------|--------------------------------------------------------------------------------------------------------|
| That it helps if you get flu                                                                | Help me                                                                         | YES                                              | [Nothing written]                                                                                      | YES                                                       | I want to take extra care now                                                                          |
| Seasonal flu is very infectious to others                                                   | It helps to reduce the chance of getting flu                                    | YES                                              | I am a great believer in all eligible patients getting a flu jab to reduce the incidence of annual flu | YES                                                       | I am a great believer in all eligible patients getting a flu jab to reduce the incidence of annual flu |
| It can be dangerous and lead to death                                                       | Don't know                                                                      | YES                                              | Just to be safe and stay away from flu                                                                 | YES                                                       | I do it every year                                                                                     |
| Very dangerous                                                                              | Can be beneficial                                                               | YES                                              | Because I was recommended to have it due to my diabetes                                                | YES                                                       | Because I was recommended to have it due to my diabetes                                                |
| Makes you very ill                                                                          | Not very much                                                                   | YES                                              | Thing that you have to do, needed and wise thing to do                                                 | YES                                                       | Thing that you have to do, needed and wise thing to do                                                 |
| Very dangerous virus - kills children, old people                                           | Nothing                                                                         | YES                                              | I've had flu previously                                                                                | YES                                                       | I want to stay alive                                                                                   |
| I don't know a lot. I just have my flu vaccine and hope it sees me through the winter       | I don't know anything about it                                                  | YES                                              | Because it's natural to get it                                                                         | YES                                                       | Because it's natural to get it                                                                         |
| Not a lot to be quite honest                                                                | They change the flu vaccine every year                                          | YES                                              | So you didn't get colds or flu etc                                                                     | YES                                                       | Because all the others have worked                                                                     |
| It can cause you to go to bed and out of action for 3-4 weeks                               | Different strains in it every year                                              | YES                                              | Because I have one every year                                                                          | YES                                                       | Because I've always had them                                                                           |
| Complicated issue. If it is prevalent it is wise to have protection if you can              | Research goes into what strain is prevalent - it mutates into different strains | YES                                              | Hopefully to remain moderately immune                                                                  | YES                                                       | To offer me reasonable protection                                                                      |
| Nothing                                                                                     | What I have read in the press                                                   | YES                                              | I thought it was the best thing to do                                                                  | YES                                                       | [Nothing written]                                                                                      |
| Can be deadly/ minimise your risk as much as possible                                       | Very little but I thought it covered one strain of flu                          | YES                                              | Hopefully helpful in not getting flu                                                                   | YES                                                       | Hopefully helpful in not getting flu                                                                   |
| Usually have a very high temperature, nose runs like a tap, can turn to pneumonia I believe | Nothing really                                                                  | NO                                               | Because I didn't want it and I don't normally get flu                                                  | NO                                                        | Because I didn't want it and I don't normally get flu                                                  |

| What do you know about seasonal flu infection?                                                            | What do you know about seasonal flu vaccination?                                                             | Last winter, did you get a seasonal flu vaccine? | Why?                                                                   | This current winter, will you get a seasonal flu vaccine? | Why?                                                                                                |
|-----------------------------------------------------------------------------------------------------------|--------------------------------------------------------------------------------------------------------------|--------------------------------------------------|------------------------------------------------------------------------|-----------------------------------------------------------|-----------------------------------------------------------------------------------------------------|
| It can be horrible                                                                                        | Researchers take what they believed to have caused flu in the previous year and produce a vaccine to stop it | YES                                              | To build up resistance to those strains of flu                         | YES                                                       | To build up resistance to those strains of flu                                                      |
| Debilitating - especially at age 68, I am a childminder I can't afford to have flu                        | Prevent you getting flu                                                                                      | YES                                              | Because I have a lot of common sense and thought it was necessary      | YES                                                       | Because I have a lot of common sense and thought it was necessary                                   |
| Puts you on your back                                                                                     | It has something added to it. I have had no repercussions having it, worthwhile having it                    | YES                                              | I have a heart condition, vital for me to have the flu vaccine         | YES                                                       | I have a heart condition, vital for me to have the flu vaccine                                      |
| Horrible to get - not something you want, confined to bed, worse as you get older, bad for young children | Best to take the vaccination                                                                                 | YES                                              | Sensible thing to do                                                   | YES                                                       | Better than getting flu                                                                             |
| Gives you a temperature - feel lousy                                                                      | They pick a vaccine that they feel is effective for that year                                                | YES                                              | As a precaution because I have an asthmatic chest                      | YES                                                       | As a precaution because I have an asthmatic chest                                                   |
| Can be quite dangerous                                                                                    | Nothing                                                                                                      | YES                                              | Because it was available and it was for my benefit to have it          | YES                                                       | I intend to have the vaccine because I feel it protects me from the flu which can make me quite ill |
| It's around everywhere - affects young and old. Old people have not got a good immune system              | It's there for a reason - to do the job it's supposed to do                                                  | NO                                               | Previous bad reaction the year before when I had 2 injections together | YES                                                       | You have to build your immune system up                                                             |
| Very debilitating - can be dangerous to certain people                                                    | Different each year                                                                                          | YES                                              | I have asthma and I am 'of an age'                                     | YES                                                       | I have asthma and I am 'of an age'                                                                  |
| Alters every year                                                                                         | Dead virus. Vaccine alters every year                                                                        | YES                                              | Nurse told me to have it and gave it to me                             | YES                                                       | So I don't get flu                                                                                  |

| What do you know about seasonal flu infection?                                                                                                              | What do you know about seasonal flu vaccination?                                                             | Last winter, did you get a seasonal flu vaccine? | Why?                                                         | This current winter, will you get a seasonal flu vaccine? | Why?                                                                       |
|-------------------------------------------------------------------------------------------------------------------------------------------------------------|--------------------------------------------------------------------------------------------------------------|--------------------------------------------------|--------------------------------------------------------------|-----------------------------------------------------------|----------------------------------------------------------------------------|
| Changes every year                                                                                                                                          | Not a lot apart from it works and it changes every year                                                      | YES                                              | Because I always have it                                     | YES                                                       | Because I don't want to get flu                                            |
| [Nothing written]                                                                                                                                           | Nothing                                                                                                      | YES                                              | Offered it because of my age                                 | YES                                                       | To prevent me from getting flu                                             |
| Can make people poorly with a high temperature and can't get out of bed                                                                                     | Offered to people with certain illnesses and people over 65 pregnant ladies                                  | YES                                              | Because I was offered it                                     | YES                                                       | Prevent me from getting flu                                                |
| I have had flu twice; I was ill and bedbound                                                                                                                | It suits me I haven't had flu since being vaccinated                                                         | YES                                              | Because I don't wantful                                      | YES                                                       | Because I don't want flu                                                   |
| Every year can be a different strain                                                                                                                        | Vaccines are developed to try and protect against this season's strains                                      | YES                                              | Advised to                                                   | YES                                                       | Advised to and sensible                                                    |
| Effects older people and younger children                                                                                                                   | Very effective                                                                                               | YES                                              | First year has met NHS criteria                              | YES                                                       | Very important                                                             |
| It can vary throughout the world                                                                                                                            | Nothing                                                                                                      | YES                                              | Advised by GP and hospital doctors                           | YES                                                       | Because it has worked for me                                               |
| [Nothing written]                                                                                                                                           | Better to have than not                                                                                      | YES                                              | Don't want to get flu                                        | YES                                                       | Don't want to get flu                                                      |
| Nothing                                                                                                                                                     | Nothing                                                                                                      | YES                                              | Advised to by doctor                                         | YES                                                       | Advised to                                                                 |
| Can cause aching joints and feel unwell                                                                                                                     | Protects against flu                                                                                         | YES                                              | To prevent flu                                               | YES                                                       | To prevent flu                                                             |
| There are different strains, result in ill health. Can be fatal in the elderly                                                                              | Doesn't always cover all strains of flu                                                                      | YES                                              | Advertised                                                   | YES                                                       | Important                                                                  |
| Seasonal occurs autumn and winter. Very uncomfortable. Can stop usual activities                                                                            | If you get a cold it is not as bad if you have had the vaccine                                               | YES                                              | Can't afford to be unwell with other current health problems | YES                                                       | Can't afford to be unwell with other current health problems               |
| More prevalent in winter months particularly around xmas when people are mixing. Can be very dangerous particularly for people with lung and heart problems | Aimed on what flu is thought to be the strain circulating in the coming season. Available from mid September | YES                                              | Always get the vaccine                                       | YES                                                       | Because believe in having all vaccinations. Prevention is better than cure |

| What do you know about seasonal flu infection?                                                                                                                      | What do you know about seasonal flu vaccination?                                           | Last winter, did you get a seasonal flu vaccine? | Why?                                                 | This current winter, will you get a seasonal flu vaccine? | Why?                                                                                   |
|---------------------------------------------------------------------------------------------------------------------------------------------------------------------|--------------------------------------------------------------------------------------------|--------------------------------------------------|------------------------------------------------------|-----------------------------------------------------------|----------------------------------------------------------------------------------------|
| Seasonal only occurs in winter. Increased exposure in crowded areas. At increased risk from grandchildren. There can be milder variations of flu, different strains | Painless. Flu vaccine doesn't completely stop people from getting flu but reduces the risk | YES                                              | In the habit of getting flu vaccine. Wife encourages | YES                                                       | Free                                                                                   |
| Very little                                                                                                                                                         | Possible side effects, read about it in the paper                                          | YES                                              | Always had it                                        | YES                                                       | Always had it                                                                          |
| It can make you very ill                                                                                                                                            | Quick, easily administered                                                                 | YES                                              | Always had it. Had to have it when I was a nurse     | YES                                                       | I just will, it's good for me                                                          |
| Nothing                                                                                                                                                             | Nothing                                                                                    | NO                                               | Had once and had a bad reaction                      | NO                                                        | [Nothing written]                                                                      |
| Nothing                                                                                                                                                             | Nothing                                                                                    | YES                                              | Kidney disease                                       | YES                                                       | Important for health. Work at a swimming pool, hot environment, more likely to get ill |
| Nothing                                                                                                                                                             | Nothing                                                                                    | NO                                               | Didn't think it was necessary. Not keen on needles   | NO                                                        | Fear of needles                                                                        |
| Shift of strains, vaccine is adjusted accordingly. Based on eggs                                                                                                    | Shift of strains, vaccine is adjusted accordingly. Based on eggs                           | YES                                              | Advised by asthma nurse                              | NO                                                        | Because I had whooping cough vaccine                                                   |
| Nothing                                                                                                                                                             | Nothing                                                                                    | YES                                              | Because I was told to                                | YES                                                       | Because I was told to                                                                  |
| Different strains. Read that it's better to get it in the morning than afternoon                                                                                    | [Nothing written]                                                                          | YES                                              | Had correspondence from surgery                      | YES                                                       | Always had it                                                                          |
| No                                                                                                                                                                  | What I read                                                                                | YES                                              | To try to not get the flu                            | YES                                                       | Not to get flu                                                                         |
| High temperature, colds, makes you poorly, bed bound                                                                                                                | It's well advertised to have it every year. On noticeboard, in paper                       | YES                                              | Prevention                                           | YES                                                       | Prevention, better to have it as getting older                                         |
| Spreads about, touching handles                                                                                                                                     | Not a lot. Different strains each year, side effects                                       | YES                                              | [Nothing written]                                    | YES                                                       | Don't want to get pneumonia                                                            |
| Lays you up for a month. You know                                                                                                                                   | Contains 2 flu strains                                                                     | YES                                              | Important - I don't want flu                         | YES                                                       | I don't want to get poorly                                                             |

| What do you know about seasonal flu infection?                                                                               | What do you know about seasonal flu vaccination?                              | Last winter, did you get a seasonal flu vaccine? | Why?                                                                                  | This current winter, will you get a seasonal flu vaccine? | Why?                                                                                  |
|------------------------------------------------------------------------------------------------------------------------------|-------------------------------------------------------------------------------|--------------------------------------------------|---------------------------------------------------------------------------------------|-----------------------------------------------------------|---------------------------------------------------------------------------------------|
| when you've had flu                                                                                                          |                                                                               |                                                  |                                                                                       |                                                           |                                                                                       |
| Very little                                                                                                                  | Very little                                                                   | YES                                              | Always had it. Daughter is an HCP so encouraged me to have                            | YES                                                       | Always had it. Daughter is an HCP so encouraged me to have                            |
| Nasty - lay you down for about a month                                                                                       | Nothing much really. Grown on egg embryo                                      | YES                                              | Reduce risk of flu                                                                    | YES                                                       | [Nothing written]                                                                     |
| Contagious, uncomfortable, nuisance                                                                                          | Side effects are okay, last a day. Worthwhile having the vaccine              | YES                                              | Anticipation of flu - don't want it                                                   | YES                                                       | I don't want flu - want to reduce my risk                                             |
| Spread by coughs and sneezes                                                                                                 | It's a vaccine. Safe                                                          | YES                                              | I have asthma, COPD and a heart condition                                             | YES                                                       | Because of my health                                                                  |
| Not a nice disease, not something you want to have                                                                           | Not much about                                                                | YES                                              | Stop getting flu                                                                      | YES                                                       | Stops me getting flu                                                                  |
| Debilitating. Can make you weak, not eat anything. Makes you feel awful, headache, worried, poorly for 2 weeks               | Different every year, differs with age. Can be difficult to know what strains | YES                                              | Don't want flu                                                                        | YES                                                       | Don't want flu                                                                        |
| Different strains                                                                                                            | Different vaccines for different age groups                                   | YES                                              | [Nothing written]                                                                     | YES                                                       | [Nothing written]                                                                     |
| No                                                                                                                           | Had for 30 years and not had the virus, so very effective                     | YES                                              | [Nothing written]                                                                     | YES                                                       | [Nothing written]                                                                     |
| Nothing                                                                                                                      | Nothing                                                                       | YES                                              | [Nothing written]                                                                     | YES                                                       | [Nothing written]                                                                     |
| Very little                                                                                                                  | Very little                                                                   | YES                                              | [Nothing written]                                                                     | YES                                                       | [Nothing written]                                                                     |
| Can be extremely serious                                                                                                     | Should/can help avoid suffering from flu                                      | YES                                              | Hopefully to avoid flu symptoms. Helps to keep other people/ myself from catching flu | YES                                                       | Hopefully to avoid flu symptoms. Helps to keep other people/ myself from catching flu |
| To experience seasonal flu infection could have serious consequence including possible death, particularly among the elderly | I accept and trust flu injection given                                        | YES                                              | [Nothing written]                                                                     | YES                                                       | [Nothing written]                                                                     |
| Very serious for older people (can be)                                                                                       | It seems to work                                                              | YES                                              | I agree with having vaccinations when no ill effects with past one                    | YES                                                       | I agree with having vaccinations when                                                 |

| What do you know about seasonal flu infection?                                                                              | What do you know about seasonal flu vaccination?                                                               | Last winter, did you get a seasonal flu vaccine? | Why?                                                           | This current winter, will you get a seasonal flu vaccine? | Why?                                                                    |
|-----------------------------------------------------------------------------------------------------------------------------|----------------------------------------------------------------------------------------------------------------|--------------------------------------------------|----------------------------------------------------------------|-----------------------------------------------------------|-------------------------------------------------------------------------|
|                                                                                                                             |                                                                                                                |                                                  |                                                                |                                                           | no ill effects with past one                                            |
| Different strains                                                                                                           | Different choice of flu vaccines and surgery choice best option for >65 yrs                                    | YES                                              | To protect myself                                              | YES                                                       | To protect myself                                                       |
| N/A                                                                                                                         | N/A                                                                                                            | YES                                              | Choice                                                         | YES                                                       | Choice                                                                  |
| Very little                                                                                                                 | Very little                                                                                                    | YES                                              | [Nothing written]                                              | YES                                                       | [Nothing written]                                                       |
| It effects anyone at any age. 2 difference vaccines this year unless 65 yrs and older than 65 yrs                           | I got the best vaccine for my age this year                                                                    | YES                                              | To protect myself from flue. My GP invited me in to receive it | YES                                                       | To protect myself and my family                                         |
| Not a lot, only from media, other people's experience. But it can be dangerous, especially for elderly or very young people | It provides resistance against some but not all flu viruses                                                    | YES                                              | [Nothing written]                                              | YES                                                       | [Nothing written]                                                       |
| Nothing                                                                                                                     | Improves chances of avoiding flu virus                                                                         | YES                                              | [Nothing written]                                              | YES                                                       | [Nothing written]                                                       |
| Not a great deal                                                                                                            | Only what the nurse tells me. 3 different vaccines, one [illegible] for <18, one for <65yrs and one for >65yrs | YES                                              | [Nothing written]                                              | YES                                                       | [Nothing written]                                                       |
| It is very dangerous and debilitating and can in some people cause death                                                    | It covers the strains that are 'most likely' to cause problems this season and it makes sense to receive it!   | NO                                               | I was not 65                                                   | YES                                                       | Because I don't want to contract flu and my GP advises to be vaccinated |
| Can be devastating, some people who have the jab get ill but thankfully that has never happened                             | You can't have it if you have a cold. If I forget I should have it ASAP                                        | YES                                              | Always had it - wouldn't stop                                  | YES                                                       | [Nothing written]                                                       |
| Can be very bad, can be debilitating. Can affect my chest because of my asthma                                              | Gives me a little bit of the flu to make my body immune to it                                                  | YES                                              | To avoid having the flu, worried a free winter                 | YES                                                       | [Nothing written]                                                       |
| Pretty devastating. No one knows what the flu is like                                                                       | Should have it yearly                                                                                          | YES                                              | Prevent getting unwell                                         | YES                                                       | [Nothing written]                                                       |

| What do you know about seasonal flu infection?                                                                                                                          | What do you know about seasonal flu vaccination?                                                                                                                                  | Last winter, did you get a seasonal flu vaccine? | Why?                                                                                             | This current winter, will you get a seasonal flu vaccine? | Why?                                                                                             |
|-------------------------------------------------------------------------------------------------------------------------------------------------------------------------|-----------------------------------------------------------------------------------------------------------------------------------------------------------------------------------|--------------------------------------------------|--------------------------------------------------------------------------------------------------|-----------------------------------------------------------|--------------------------------------------------------------------------------------------------|
| until they have had it                                                                                                                                                  |                                                                                                                                                                                   |                                                  |                                                                                                  |                                                           |                                                                                                  |
| Can be a killer                                                                                                                                                         | Can have side effects -protection side is greater                                                                                                                                 | YES                                              | To keep well                                                                                     | YES                                                       | To keep well                                                                                     |
| Flu is really horrible!                                                                                                                                                 | Just a jab and done                                                                                                                                                               | YES                                              | To keep well                                                                                     | YES                                                       | [Nothing written]                                                                                |
| Makes people very unwell and very quickly                                                                                                                               | Need to have yearly                                                                                                                                                               | YES                                              | To protect myself and my family                                                                  | YES                                                       | [Nothing written]                                                                                |
| Not very nice, shivering, temp, cough, etc                                                                                                                              | Helps to safeguard me                                                                                                                                                             | YES                                              | To help me                                                                                       | YES                                                       | [Nothing written]                                                                                |
| Can lead to pneumonia and sickness                                                                                                                                      | Helps me not have problems. Have to have every year                                                                                                                               | YES                                              | To avoid sickness                                                                                | YES                                                       | To avoid getting unwell                                                                          |
| Do not know anything                                                                                                                                                    | Every year, will get a red sore spot on arm                                                                                                                                       | YES                                              | Because it is sensible                                                                           | YES                                                       | [Nothing written]                                                                                |
| Can range from mild to very severe with life threatening results. Can mutate year to year its form                                                                      | Not 100%, can't be. Varies year to year in effectiveness. I would rate that better than getting flu. Some groups are against vaccines not just flu one. I rate this an[illegible] | YES                                              | As always. Protection against flu realise not 100% but flu can be more serious than people think | YES                                                       | As always. Protection against flu realise not 100% but flu can be more serious than people think |
| Nothing - can be very serious. Changes form every year, different flu germs                                                                                             | Meant to be dead vaccine can't get flu from it                                                                                                                                    | YES                                              | Doctor recommended                                                                               | YES                                                       | Doctors recommended                                                                              |
| Can lead to death, especially in older people and young children. It's important that all relevant ages have the vaccine. Can even make healthy people feel very unwell | Has to be planned and vaccine based on the information they have ready for the next year. Sometimes it isn't quite right for the flu that's around that year                      | YES                                              | Need to keep healthy as I live alone                                                             | YES                                                       | Keeping well. I live alone so very important                                                     |
| Had it once - you would never confuse flu with a cold. When you have had it, it really knocks me out                                                                    | Thick it is pretty effective not 100%. Urban myth that it gives you flu but I don't believe that some people say they have had                                                    | YES                                              | If I am called from my GP I obey                                                                 | YES                                                       | If I am called from my GP I obey                                                                 |



| What do you know about seasonal flu infection?                                                                                                                                                                     | What do you know about seasonal flu vaccination?                                                                                                                                                   | Last winter, did you get a seasonal flu vaccine? | Why?                                                                                                                                       | This current winter, will you get a seasonal flu vaccine? | Why?                                                                                                   |
|--------------------------------------------------------------------------------------------------------------------------------------------------------------------------------------------------------------------|----------------------------------------------------------------------------------------------------------------------------------------------------------------------------------------------------|--------------------------------------------------|--------------------------------------------------------------------------------------------------------------------------------------------|-----------------------------------------------------------|--------------------------------------------------------------------------------------------------------|
|                                                                                                                                                                                                                    | worse flu from getting it                                                                                                                                                                          |                                                  |                                                                                                                                            |                                                           |                                                                                                        |
| Changes every year. Can be very dangerous for older people or people with certain problem COPD etc. Also young people with underdeveloped immune system. I'm not especially at risk but important to be vaccinated | Recommended that people over 65yrs get it. Its optional - can get from chemist if not doctor. I did the last 2 years. Do not give to people with egg allergies. Some people can have bad reactions | YES                                              | Planning to have it every year as over 65yrs. Helps to prevent population not just me from getting flu                                     | YES                                                       | Planning to have it every year as over 65yrs. Helps to prevent population not just me from getting flu |
| Had it once - won't want it again, worried be worse at my age                                                                                                                                                      | Based on eggs. Can get a reaction to the vaccine                                                                                                                                                   | YES                                              | Have it every year                                                                                                                         | YES                                                       | Have it every year                                                                                     |
| Symptom you get - aches and pains feeling really ill                                                                                                                                                               | What I have heard, I am told injected with a strain of flu                                                                                                                                         | NO                                               | I consider myself for my age really fit and able to cope. Some elderly people may need it                                                  | NO                                                        | Same reasons, think I could fight it off                                                               |
| I have had it so know it is nasty. Very infectious and debilitating. Good there is a vaccine that can stop you getting it                                                                                          | Know it changed last year for older people to stimulate the immune system. Easy to have, its simple, it's never affected me badly                                                                  | YES                                              | It's necessary to have it if offered                                                                                                       | YES                                                       | Same answer - don't want flu                                                                           |
| Around for years and years and there are different types of flu every year. Dependent on one's own health can make you more prone to flu                                                                           | Only thing I know that they are constantly trying to improve it so different vaccines every year                                                                                                   | YES                                              | Had it for a least 15yrs and its worked 90% of the time. I have not had flu despite being chesty (asthmatic chest) but not in summer month | YES                                                       | Always worked in the past. I am getting older and getting chestier                                     |
| Affects me badly. Flu puts me on my back. My lungs very bad so don't want to catch flu                                                                                                                             | Prevents me catching flu, why not have it?                                                                                                                                                         | YES                                              | [Nothing written]                                                                                                                          | YES                                                       | [Nothing written]                                                                                      |
| Varies from mild to deadly. Some of my family died of flu in 1918. As you get older less able                                                                                                                      | It's targeted each year to what they think the flu will be this winter, bit hit and miss but                                                                                                       | YES                                              | For all above reasons, it's a good idea, severe [illegible] people say it helps against colds and                                          | YES                                                       | For all above reasons, it's a good idea, severe [illegible] people say it helps                        |

| What do you know about seasonal flu infection?                                                                                            | What do you know about seasonal flu vaccination?                                                                                   | Last winter, did you get a seasonal flu vaccine? | Why?                                                                     | This current winter, will you get a seasonal flu vaccine? | Why?                                                                                   |
|-------------------------------------------------------------------------------------------------------------------------------------------|------------------------------------------------------------------------------------------------------------------------------------|--------------------------------------------------|--------------------------------------------------------------------------|-----------------------------------------------------------|----------------------------------------------------------------------------------------|
| to fight it off. You can die from it especially if frail or elderly                                                                       | good at doing its job. Varies from year to year in effectiveness                                                                   |                                                  | other infections although not proven - yes it's worth it                 |                                                           | against colds and other infections although not proven - yes it's worth it             |
| Knocked me off my feet 7- 10 day, high temp, chest poorly, generally unwell, aches and pains                                              | Not a lot. Something to do with chickens, some people say it doesn't work                                                          | YES                                              | [Nothing written]                                                        | YES                                                       | [Nothing written]                                                                      |
| Puts you in bed, make you weak, leaves you with complication - chest etc. Not a nice thing to have, avoid if feasible as comes every year | Doctor tells me when due and says you need it that's all I know. Get a letter saying flu vaccination is due                        | YES                                              | Don't want flu. Had flu 4-5 yrs ago and never since                      | YES                                                       | Same reasons but also as you get older get more complications so need to keep healthy  |
| I have had it and very different to a cold. Body aches, all over, skin tender, dry hard cough                                             | No nothing                                                                                                                         | YES                                              | Always have it. Offered when [illegible] did have to come back           | YES                                                       | Because I have it every winter                                                         |
| It's debilitating, puts you on your back if real flu. Takes a while to get over, not like 'man flu'                                       | I get it in my arm and that's it!                                                                                                  | YES                                              | Because I get bronchitis                                                 | YES                                                       | Because I get bronchitis                                                               |
| Very debilitating, people die from it, dangerous for asthmatics (my husband). Never had it but witness it                                 | I don't know anything apart from I [illegible] and have it. Know here is a new one this year but I haven't noticed any differences | YES                                              | That it's necessary as it's a preventive measure, don't want to have flu | YES                                                       | That it's necessary as it's a preventive measure, don't want to have flu               |
| Like a heavy cold, you feel weak and tired. Takes 4-5 days to get over it, you would neurophen to treat it                                | Not a lot, been around a while, lots of people have it, some say it works some say it doesn't work, you can get a cold with it     | NO                                               | Don't think about flu so won't bother                                    | NO                                                        | Don't think about flu so won't bother                                                  |
| Not much at all but highly infectious. Can be rather dangerous to people with other ailments or older people                              | Nothing                                                                                                                            | YES                                              | Have had it every year- routine                                          | YES                                                       | It might stop me catching the flu. I am getting older so would be more effected by flu |

| What do you know about seasonal flu infection?                                                                                          | What do you know about seasonal flu vaccination?                                           | Last winter, did you get a seasonal flu vaccine? | Why?                                                                                   | This current winter, will you get a seasonal flu vaccine? | Why?                                              |
|-----------------------------------------------------------------------------------------------------------------------------------------|--------------------------------------------------------------------------------------------|--------------------------------------------------|----------------------------------------------------------------------------------------|-----------------------------------------------------------|---------------------------------------------------|
| Nothing. Fevers, every year could get bronchitis but vaccine has helped. Can't move, can't work, can't get out of bed. Weakness of limb | Nothing - imagine it gives you a dose of flu                                               | YES                                              | It's been effective in past years. Helps me not need antibodies for my COPD/bronchitis | YES                                                       | What to avoid bronchitis and as above             |
| It's dangerous, gives you sneezes and colds                                                                                             | No real opinion about it                                                                   | NO                                               | Can't remember why                                                                     | YES                                                       | [Nothing written]                                 |
| Can cause pneumonia. Lack of energy, can't eat or drink. Leads to other things. High temperature                                        | Just had it when I came in, didn't notice anything. Had flu afterwards so not convinced    | YES                                              | Cause doctor said to have it                                                           | YES                                                       | Not sure, had flu anyway                          |
| Comes in many forms, can change every season. Killed a lot of people - Spanish flu- filled more than WWI                                | I understand it to be a watered down type of flu. Gives my body something to fight against | YES                                              | Because I have had it for last 4-5yrs                                                  | YES                                                       | Because I have had it for last 4-5yrs             |
| Not very much other than it can be dangerous and you can die from it, high temp, etc                                                    | Nothing about that, it's probably a dose of the flu so effects immune system               | YES                                              | Important to do so                                                                     | YES                                                       | Important to do so                                |
| People who get it could be very ill                                                                                                     | Don't know                                                                                 | YES                                              | Because I have not had flu since having it                                             | YES                                                       | Because it insensible                             |
| Very disabling, leading to chest problems                                                                                               | Prevents flue                                                                              | YES                                              | For protection against flu                                                             | YES                                                       | Again, for my protection against flu              |
| Not a good thing to have!                                                                                                               | Mixed vaccine                                                                              | YES                                              | Protection from flue                                                                   | YES                                                       | Protection from flu                               |
| I was recommended in 2005 to have the flu jab following triple by-pass heart surgery                                                    | It is [illegible] to control flu infection                                                 | YES                                              | [Nothing written]                                                                      | YES                                                       | [Nothing written]                                 |
| Is proven to be effective                                                                                                               | [Nothing written]                                                                          | YES                                              | I intend to have it every year                                                         | YES                                                       | [Nothing written]                                 |
| Not a lot other than difficulty in covering all strains                                                                                 | Nothing                                                                                    | YES                                              | Guidance by nurse                                                                      | YES                                                       | [Nothing written]                                 |
| The vaccine for over 65's has changed this year. Flu can't be cured                                                                     | The vaccine for over 65's is new this year                                                 | YES                                              | Was encouraged by practice                                                             | YES                                                       | Own protection. Less of a burden on third parties |

| What do you know about seasonal flu infection?                                                                    | What do you know about seasonal flu vaccination?                                                                                                                             | Last winter, did you get a seasonal flu vaccine? | Why?                                                                                                                        | This current winter, will you get a seasonal flu vaccine? | Why?                                                                                                    |
|-------------------------------------------------------------------------------------------------------------------|------------------------------------------------------------------------------------------------------------------------------------------------------------------------------|--------------------------------------------------|-----------------------------------------------------------------------------------------------------------------------------|-----------------------------------------------------------|---------------------------------------------------------------------------------------------------------|
| Flu can be a serious infection particularly for the elderly or those with chest problems e.g., asthma             | Carries 3 or 4 strains of the flu virus which the experts think will be most prevalent                                                                                       | YES                                              | I get it every year                                                                                                         | YES                                                       | It's important and I get it every year                                                                  |
| [illegible] in hospital if I did not have it                                                                      | Made up of different strains                                                                                                                                                 | YES                                              | [Nothing written]                                                                                                           | YES                                                       | [Nothing written]                                                                                       |
| Very infectious, extremely uncomfortable, can be life threatening                                                 | Hopefully shields you against catching it and passing it on to others                                                                                                        | YES                                              | Because I thought it was the sensible thing to do - as it was available                                                     | YES                                                       | Because I thought it was the sensible thing to do - as it was available                                 |
| They occur                                                                                                        | Sometimes not as successful                                                                                                                                                  | YES                                              | Sensible                                                                                                                    | YES                                                       | Sensible                                                                                                |
| Vaccine varies from year to year so needs new vaccine every year                                                  | More or less painless, must be done every year                                                                                                                               | YES                                              | [Nothing written]                                                                                                           | YES                                                       | [Nothing written]                                                                                       |
| Can be caught it different ways, avoid people who have flu                                                        | Each year it different strain, and tested                                                                                                                                    | YES                                              | [Nothing written]                                                                                                           | YES                                                       | [Nothing written]                                                                                       |
| It varies from year to year. It may be detrimental to the health of the elderly like me, and can cause death      | It is adjusted to cope with new strains of the virus in order to prevent as far as possible people catching the disease. A great deal of research is carried out to that end | YES                                              | I felt the advice from the surgery to have a shot was sensible. I trust my doctors; I did not want to catch flu if possible | YES                                                       | It seems a good idea as I have not had flue for several years - probably because of the flu vaccination |
| I have become more aware of the 'seasonality' in the past 20 years and recognise that it can be very debilitating | I understand there is a need to predict the likely flu strain in advance of its arrival and that there is a longish lead time in producing effective vaccines                | YES                                              | Advised by GP                                                                                                               | YES                                                       | Prevention is better than cure                                                                          |
| Very little                                                                                                       | Not uncomfortable                                                                                                                                                            | YES                                              | Provided by surgery                                                                                                         | YES                                                       | Helps avoiding flu                                                                                      |
| Becomes more prevalent after start of school term. Varies in type from one year to the next                       | It is not a live vaccine which is important to me                                                                                                                            | YES                                              | It has worked effectively in previous years                                                                                 | YES                                                       | Previous effectiveness                                                                                  |

| What do you know about seasonal flu infection?                                                                                 | What do you know about seasonal flu vaccination?                                                                          | Last winter, did you get a seasonal flu vaccine? | Why?                                                                           | This current winter, will you get a seasonal flu vaccine? | Why?                                                       |
|--------------------------------------------------------------------------------------------------------------------------------|---------------------------------------------------------------------------------------------------------------------------|--------------------------------------------------|--------------------------------------------------------------------------------|-----------------------------------------------------------|------------------------------------------------------------|
| Recommended by others. Part age related                                                                                        | Available, FOC on demand                                                                                                  | NO                                               | [Nothing written]                                                              | YES                                                       | [Nothing written]                                          |
| There are a variety of strains [illegible] not guaranteed to be the right one but mainly effective in stopping flu [illegible] | It's pretty [illegible] advised by medical professionals especially at risk patients such as myself                       | YES                                              | Because I was advised [illegible] it was sensible                              | YES                                                       | I am an [illegible]!                                       |
| Very important                                                                                                                 | Good for me                                                                                                               | YES                                              | [Nothing written]                                                              | YES                                                       | [Nothing written]                                          |
| Hot temp, makes you feel very ill, cannot get out of bed, headaches, shivers                                                   | Best guess                                                                                                                | YES                                              | Don't want flu                                                                 | YES                                                       | [Nothing written]                                          |
| Its best avoided at all costs. Flu can kill old people I believe!                                                              | We get the publicity from the surgery through text messages, and we can choose where to have the vaccine                  | YES                                              | I believe it's an individual responsibility to avoid illness wherever possible | YES                                                       | [Nothing written]                                          |
| High temp, shiver, ache, lasts 7-10 days, feel very unwell. Potential chest infection                                          | Different for over 65yr olds. Different strains combined. Had a reaction to the 2018/2019 vaccine- felt unwell for 2 days | YES                                              | To protect myself especially as I have a lung condition                        | YES                                                       | To protect myself especially as I have a lung condition    |
| Very little other than effects of flu can be most debilitating, consequently quite dangerous                                   | Recommended by GP to prevent or reduce possibility of contracting flu                                                     | YES                                              | [Nothing written]                                                              | YES                                                       | [Nothing written]                                          |
| Severe infection making me very ill                                                                                            | A combination of 2 strains of flu virus - which WHO have recommended for that year                                        | YES                                              | I always have one                                                              | YES                                                       | [Nothing written]                                          |
| High temperature, stay in bed                                                                                                  | 5 strains in vaccine                                                                                                      | YES                                              | Offered                                                                        | YES                                                       | When offered                                               |
| Bedridden, unable to cope                                                                                                      | Combination of expected strains for that year                                                                             | YES                                              | Was a carer and needed it to protect myself and others                         | YES                                                       | I'm prone to flu round about March time so need protection |
| Very serious, bedridden, extremely ill for days, 4-5days                                                                       | I know I will always have it. Feel it is important and                                                                    | YES                                              | Because I don't want to get flu                                                | YES                                                       | Because I don't want to get flu                            |

| What do you know about seasonal flu infection?                                                                           | What do you know about seasonal flu vaccination?                        | Last winter, did you get a seasonal flu vaccine? | Why?                                                                                                 | This current winter, will you get a seasonal flu vaccine? | Why?                                                                                            |
|--------------------------------------------------------------------------------------------------------------------------|-------------------------------------------------------------------------|--------------------------------------------------|------------------------------------------------------------------------------------------------------|-----------------------------------------------------------|-------------------------------------------------------------------------------------------------|
|                                                                                                                          | helps herd immunity                                                     |                                                  |                                                                                                      |                                                           |                                                                                                 |
| I know you can die of flu. Flu virus mutates. I know it is very different from cold. Serious illness                     | I know it changes every year. Sometimes get a reaction to it            | YES                                              | To protect myself                                                                                    | YES                                                       | To protect myself                                                                               |
| Flu - very unwell for weeks. Different strains every year                                                                | Propagated in egg albumen. I find it painless                           | YES                                              | I don't want flu                                                                                     | YES                                                       | My experience of flu was very unpleasant                                                        |
| Worse for people with other medical problems                                                                             | Some side effects for some people                                       | NO                                               | [Nothing written]                                                                                    | NO                                                        | Using homeopathy                                                                                |
| Some seasons can be worse than others. Real 'flu can be serious and debilitating                                         | It should protect me from the 'flu viruses                              | YES                                              | I have it every year in the hope that it protects me                                                 | YES                                                       | I have it every year in the hope that it protects me                                            |
| Very debilitating, headaches, sweating, fever-very ill, felt I was going to die                                          | Need to have it before winter. Don't get it if you are unwell           | YES                                              | To protect myself, my family and others                                                              | YES                                                       | To protect myself, my family and others                                                         |
| It would be bad - could lead to chest infections etc                                                                     | Very little                                                             | YES                                              | I have asthma and have had a few chest infections during winter months and I was advised to have one | YES                                                       | Because of previous chest infections during winter months                                       |
| It would be bad                                                                                                          | I don't know                                                            | YES                                              | To protect myself                                                                                    | YES                                                       | To protect myself                                                                               |
| Symptoms get worse with age and if you suffer with any chest problems its very wise to have flu jab                      | Varying strengths and strains, changes every year                       | YES                                              | Did it through work and therefore easy as on site - no travelling or waiting involved                | Not specified                                             | Unsure                                                                                          |
| Changes yearly. Unpleasant. Can be dangerous                                                                             | Sometimes it is ineffective. Last year it seemed to work                | YES                                              | I have hyperthyroidism and atrial fibrillation and thought I would be more proactive than usual      | YES                                                       | I have hyperthyroidism and atrial fibrillation and thought I would be more proactive than usual |
| Big difference between cold and flu. Bedridden. Don't eat. Chance of chest infection. No appetite. Very tired, very weak | Older people should have it. Think it is effective especially for 65yrs | YES                                              | To protect myself                                                                                    | YES                                                       | To protect myself                                                                               |

| What do you know about seasonal flu infection?                                                                    | What do you know about seasonal flu vaccination? | Last winter, did you get a seasonal flu vaccine? | Why?                             | This current winter, will you get a seasonal flu vaccine? | Why?                             |
|-------------------------------------------------------------------------------------------------------------------|--------------------------------------------------|--------------------------------------------------|----------------------------------|-----------------------------------------------------------|----------------------------------|
| I had it twice and it was one of the worst illnesses I have ever had. Makes you incapable, took a long to recover | It protects me from getting flu                  | YES                                              | To protect myself and my partner | YES                                                       | To protect myself and my partner |
| Makes you very unwell. Terrible aches and pains, shivers. Bedridden. Worse than a cold                            | It changes every year. I trust that it works     | YES                                              | To protect myself                | YES                                                       | To protect myself                |

**Table S4.** Responses to open-ended patient questions answered after visit with healthcare provider/physician (each row represents a different patient's response).

| What do you know about seasonal flu infection? | What do you know about the adjuvanted seasonal flu vaccine? | What concerns do you have about getting the adjuvanted seasonal flu vaccine? | Some of the good things about getting the adjuvanted seasonal flu | Some of the bad things about getting the adjuvanted seasonal flu           | Who would approve of you getting the adjuvanted seasonal flu vaccine?                  | Who would disapprove of you getting the adjuvanted seasonal flu vaccine? |
|------------------------------------------------|-------------------------------------------------------------|------------------------------------------------------------------------------|-------------------------------------------------------------------|----------------------------------------------------------------------------|----------------------------------------------------------------------------------------|--------------------------------------------------------------------------|
| More aware of infection and what it can do     | Know its trivalent and for over 65's                        | No                                                                           | Hopefully not getting flu                                         | Some people have a reaction                                                | All my family                                                                          | None                                                                     |
| [Nothing written]                              | [Nothing written]                                           | [Nothing written]                                                            | [Nothing written]                                                 | [Nothing written]                                                          | [Nothing written]                                                                      | [Nothing written]                                                        |
| [Nothing written]                              | Different vaccine                                           | [Nothing written]                                                            | [Nothing written]                                                 | [Nothing written]                                                          | [Nothing written]                                                                      | [Nothing written]                                                        |
| Fever, sore throat                             | 3 strains                                                   | No                                                                           | Prevention                                                        | No                                                                         | Wife                                                                                   | No                                                                       |
| [Nothing written]                              | Heightened vaccine for over 65's                            | No                                                                           | Hopefully don't get flu. If you do, it reduces severity           | Unwell for 3/52 with influenza. I always get a reaction every time         | All groups                                                                             | No                                                                       |
| Nothing                                        | Nothing                                                     | None                                                                         | Protects me                                                       | No                                                                         | Lives alone. No family                                                                 | Lives alone. No family                                                   |
| Can affect older people worse                  | 3 strains                                                   | No                                                                           | Stops getting the flu                                             | Don't know of any                                                          | Family                                                                                 | No                                                                       |
| Very little                                    | Very little                                                 | None                                                                         | Hope it will stop getting the flu or to a lesser degree           | None                                                                       | Family                                                                                 | Nobody                                                                   |
| Feverish, aches and pains                      | No                                                          | No                                                                           | Be immune from flu                                                | No                                                                         | Family and friends                                                                     | No                                                                       |
| It helps to protect against flu                | Specific strain                                             | None                                                                         | Protects against flu                                              | N/A None                                                                   | Friends                                                                                | None                                                                     |
| Nothing                                        | It is given to avoid flu                                    | None                                                                         | Hopefully I will avoid getting the flu                            | Worried about possible side effects                                        | Spouse, friends, work colleagues and management                                        | None                                                                     |
| It can be very debilitating                    | Nothing except it is used for over 65 generation            | Don't know what it is and don't know what it does to my system!              | I assume it keeps me safe                                         | Made me feel flu like symptoms but one cannot tell if it is flu or a virus | My disabled husband and my family and friends as I am a full time carer for my husband | My daughter                                                              |
| Less likely to contract flu                    | Less likely to contract flu                                 | None                                                                         | Less likely to contract infections                                | [Nothing written]                                                          | Spouse/GP                                                                              | [Nothing written]                                                        |
| Worse for older patients                       | Specific for over 65 years olds                             | None                                                                         | Specific to older patients                                        | None                                                                       | All my friends and family                                                              | None                                                                     |



| What do you know about seasonal flu infection?                                                                                                   | What do you know about the adjuvanted seasonal flu vaccine?                                | What concerns do you have about getting the adjuvanted seasonal flu vaccine? | Some of the good things about getting the adjuvanted seasonal flu   | Some of the bad things about getting the adjuvanted seasonal flu | Who would approve of you getting the adjuvanted seasonal flu vaccine? | Who would disapprove of you getting the adjuvanted seasonal flu vaccine? |
|--------------------------------------------------------------------------------------------------------------------------------------------------|--------------------------------------------------------------------------------------------|------------------------------------------------------------------------------|---------------------------------------------------------------------|------------------------------------------------------------------|-----------------------------------------------------------------------|--------------------------------------------------------------------------|
| There are various strains of flu that could be circulating in the winter and the NHS selects a vaccine appropriate for the most likely major one | Appropriate for the over 65's                                                              | None                                                                         | Hopefully prevents one catching flu                                 | Not known                                                        | Family and friends                                                    | None                                                                     |
| Not a lot                                                                                                                                        | Not a lot                                                                                  | None                                                                         | Helps keep you well                                                 | None that I know of                                              | Family and friends                                                    | None that I know of                                                      |
| Can affect older patients more                                                                                                                   | Better for older patients                                                                  | None                                                                         | Better for older patients                                           | None                                                             | Family, friends and surgery                                           | None                                                                     |
| Can be dangerous to people with diabetes and older people                                                                                        | Recommended for older patients over 65                                                     | None                                                                         | [Illegible] against more strains of flu                             | Reaction around injection area                                   | Surgery, friends and family                                           | None                                                                     |
| [Nothing written]                                                                                                                                | More effective against flu                                                                 | None                                                                         | Prevents 'flu symptoms                                              | None                                                             | Spouse, family                                                        | None                                                                     |
| Bad for elderly                                                                                                                                  | Specific for elderly                                                                       | None                                                                         | Protects from flu                                                   | None                                                             | Family and friends                                                    | None                                                                     |
| Can be a killer                                                                                                                                  | Designed especially for the elderly                                                        | None                                                                         | Help to combat the flu virus                                        | For myself, none                                                 | Age Concern                                                           | None                                                                     |
| It was very helpful                                                                                                                              | The results are good                                                                       | None                                                                         | It helps people of my age                                           | None                                                             | They all agree                                                        | None                                                                     |
| [Nothing written]                                                                                                                                | [Nothing written]                                                                          | [Nothing written]                                                            | [illegible]                                                         | None                                                             | Peers                                                                 | None                                                                     |
| An always unpleasant viral infection which can be serious for the elderly or young, or those with other health problems                          | A harmless flu vac that has been matched as well as possible to the current strain of 'flu | None                                                                         | Peace of mind, hope that won't get flu or complications this season | It does not match all strains of 'flu                            | Spouse, family, medical practitioner                                  | Some friends - "you always get flu if you have those vacs!"              |
| Old people are in more danger                                                                                                                    | Doctor gives it out                                                                        | None                                                                         | Won't get flu                                                       | None                                                             | Family                                                                | No one                                                                   |
| Any flu infection is debilitating but winter flu more so                                                                                         | Recommended to combat infection                                                            | None                                                                         | Reduced risk, peace of mind                                         | None                                                             | Family                                                                | None                                                                     |

| What do you know about seasonal flu infection?                                                                                                        | What do you know about the adjuvanted seasonal flu vaccine?                                                                                                                                                                                      | What concerns do you have about getting the adjuvanted seasonal flu vaccine? | Some of the good things about getting the adjuvanted seasonal flu | Some of the bad things about getting the adjuvanted seasonal flu             | Who would approve of you getting the adjuvanted seasonal flu vaccine?                                                                      | Who would disapprove of you getting the adjuvanted seasonal flu vaccine? |
|-------------------------------------------------------------------------------------------------------------------------------------------------------|--------------------------------------------------------------------------------------------------------------------------------------------------------------------------------------------------------------------------------------------------|------------------------------------------------------------------------------|-------------------------------------------------------------------|------------------------------------------------------------------------------|--------------------------------------------------------------------------------------------------------------------------------------------|--------------------------------------------------------------------------|
| An infectious disease of the respiratory system                                                                                                       | Increased protection in people aged 65 years and over                                                                                                                                                                                            | Mainly side effects - swelling/ inflammation at point of injection           | Increased effectiveness in elderly people                         | Mainly concerned with [illegible]                                            | Family/doctor                                                                                                                              | [Nothing written]                                                        |
| Protects against flu, harder to shake off when you get older                                                                                          | Protects against flu                                                                                                                                                                                                                             | None                                                                         | Helps protect against flu                                         | None                                                                         | Family                                                                                                                                     | Don't know                                                               |
| It could kill me                                                                                                                                      | It protects against any health issues I may have                                                                                                                                                                                                 | None                                                                         | I feel safe within myself as I have other health issues           | I may have a bad reaction but as yet this has not happened                   | Spouse, daughter and her family, friends                                                                                                   | None                                                                     |
| Seasonal flu strains are [illegible] that usually develop in the east and spread west, being most common in the winter in the western world           | Which type of flu mutation is expected to spread is [illegible] vaccination. Strains are grown in egg embryos then the virus is [illegible] and killed to make it inactive, the body still reacts to produce antibodies to the deactivated virus | None                                                                         | Can stop or lessen flu epidemics                                  | Sometimes vaccine is ineffective against the strain of flu being transmitted | Friends and family                                                                                                                         | None                                                                     |
| [Nothing written]                                                                                                                                     | [Nothing written]                                                                                                                                                                                                                                | [Nothing written]                                                            | Avoiding flu                                                      | None                                                                         | GP and medical team                                                                                                                        | [Nothing written]                                                        |
| I know that it can be very infectious                                                                                                                 | I know that it is necessary for the winter season and should be taken as advised                                                                                                                                                                 | None                                                                         | I found it quick and painless with very little after effects      | None                                                                         | Friends and family                                                                                                                         | [Nothing written]                                                        |
| The WHO monitor the flu situation around the world and decide which strain is going to be the most virulent and devise a vaccine to prevent infection | It is a vaccine cultured in the laboratory to effectively fight the relevant flu strain. I believe this year's was cultured using eggs, is                                                                                                       | None                                                                         | You don't get flu and if you do it is a mild dose                 | None                                                                         | I would approve of young children, people with low immunity problems and the elderly, as well as people working in healthcare, getting it. | None                                                                     |

| What do you know about seasonal flu infection?                                | What do you know about the adjuvanted seasonal flu vaccine?                | What concerns do you have about getting the adjuvanted seasonal flu vaccine? | Some of the good things about getting the adjuvanted seasonal flu | Some of the bad things about getting the adjuvanted seasonal flu | Who would approve of you getting the adjuvanted seasonal flu vaccine? | Who would disapprove of you getting the adjuvanted seasonal flu vaccine? |
|-------------------------------------------------------------------------------|----------------------------------------------------------------------------|------------------------------------------------------------------------------|-------------------------------------------------------------------|------------------------------------------------------------------|-----------------------------------------------------------------------|--------------------------------------------------------------------------|
|                                                                               | able to fight 4 different strains                                          |                                                                              |                                                                   |                                                                  | Everyone would approve of me getting it                               |                                                                          |
| Affects over 65s more                                                         | More effective for over 65s                                                | None                                                                         | Prevents flu and complications                                    | None                                                             | Friends, family                                                       | None                                                                     |
| Only prevents some virus's                                                    | Supposed to prevent more infection                                         | At this time none                                                            | Prevents some virus                                               | Cannot prevent all                                               | Medical professionals                                                 | Don't know                                                               |
| It can affect elderly over 65                                                 | Helps over 65                                                              | [Nothing written]                                                            | Prevents flu                                                      | [Nothing written]                                                | All                                                                   | None                                                                     |
| It is a very unpleasant illness                                               | It boosts the immune system                                                | It might in itself make me ill                                               | [Nothing written]                                                 | [Nothing written]                                                | [Nothing written]                                                     | [Nothing written]                                                        |
| It can be dangerous in older people                                           | It is recommended to older people                                          | None                                                                         | Helps you fight the infection                                     | None that I know of                                              | Spouse, family                                                        | A few people have had bad effects from it                                |
| Real flu is not a cold. Needs to be treated with respect!                     | Can get from GP                                                            | None                                                                         | Am 80: need to avoid flu                                          | [Nothing written]                                                | Spouse                                                                | [Nothing written]                                                        |
| Important to have                                                             | Nothing                                                                    | None                                                                         | Helps to prevent flu                                              | [Nothing written]                                                | Family                                                                | None                                                                     |
| It makes you very ill                                                         | Not known                                                                  | None                                                                         | [Nothing written]                                                 | [Nothing written]                                                | [Nothing written]                                                     | [Nothing written]                                                        |
| It is debilitating and the person is very ill                                 | Don't know                                                                 | None                                                                         | It releases any tension regarding catching the 'flu               | It hurts! Ha!                                                    | Husband and family                                                    | None                                                                     |
| [Nothing written]                                                             | [Nothing written]                                                          | [Nothing written]                                                            | [Nothing written]                                                 | [Nothing written]                                                | [Nothing written]                                                     | [Nothing written]                                                        |
| [Nothing written]                                                             | [Nothing written]                                                          | [Nothing written]                                                            | [Nothing written]                                                 | Sometimes get cold like symptoms                                 | Spouse/friends etc                                                    | None                                                                     |
| [Nothing written]                                                             | I know it is important to get flu vaccine as I have a weakness in my chest | I don't have concerns as I have had it for some time                         | I know it will help me if I get flu it won't affect as much       | I don't know if there is any                                     | Chest asthma patients, also Lucy (bad breathing)                      | Most of my friends all get flu jab                                       |
| It is very infectious and has serious health complications for the vulnerable | It can help protect from flu                                               | None                                                                         | It may help reduce the incidence of flu in the elderly population | None                                                             | Spouse, friends, relatives, work colleagues                           | None                                                                     |
| Can get poorly with it                                                        | Vaccine is to protect from getting flu                                     | Side effect                                                                  | Don't know                                                        | Don't know                                                       | Family, daughter, doctor                                              | Son                                                                      |

| What do you know about seasonal flu infection?                       | What do you know about the adjuvanted seasonal flu vaccine?                     | What concerns do you have about getting the adjuvanted seasonal flu vaccine?    | Some of the good things about getting the adjuvanted seasonal flu                              | Some of the bad things about getting the adjuvanted seasonal flu                             | Who would approve of you getting the adjuvanted seasonal flu vaccine? | Who would disapprove of you getting the adjuvanted seasonal flu vaccine? |
|----------------------------------------------------------------------|---------------------------------------------------------------------------------|---------------------------------------------------------------------------------|------------------------------------------------------------------------------------------------|----------------------------------------------------------------------------------------------|-----------------------------------------------------------------------|--------------------------------------------------------------------------|
| It can make you very unwell                                          | Very beneficial for over 65's                                                   | No                                                                              | Hopefully you are protected against flu                                                        | Can give you a sore arm                                                                      | Health care professionals                                             | Can't think of any                                                       |
| Makes you very ill                                                   | Don't know anything                                                             | No concerns - I have had no problems having the vaccine                         | Feeling of security                                                                            | Possibility of side-effects                                                                  | Wife, family                                                          | No                                                                       |
| Happens more in the winter, dangerous, long recovery time            | Developed for older people with added content                                   | No concerns                                                                     | It's free                                                                                      | I have never had any problems so no bad things for me                                        | Family                                                                | None                                                                     |
| Put to bed with it                                                   | Not a lot                                                                       | No concerns                                                                     | I get it and don't think about flu after my injection                                          | No bad thing. It would be a bad thing if I didn't get it                                     | Family                                                                | None                                                                     |
| Not a thing                                                          | Not a thing                                                                     | None whatsoever                                                                 | I don't get any colds or flu right through winter                                              | The older vaccines - my arm used to hurt for a week. The new one - my arm hasn't hurt at all | Family                                                                | I honestly don't know - I don't discuss it with anybody                  |
| Strike you down suddenly, in bed for 2-3 weeks                       | Don't know anything about it                                                    | No concerns                                                                     | Prevent you from getting flu                                                                   | Aggravation on arm                                                                           | Family - son/ daughter                                                | No one                                                                   |
| Strain that becomes predominately prevalent at certain times of year | Different type/ combination this year                                           | None whatsoever, I trust the medical professionals                              | Safeguards general health at a time of year where it is fairly essential                       | Can't think of any                                                                           | Wife                                                                  | None                                                                     |
| Can be affected mildly or seriously                                  | Don't know anything really                                                      | None - I trust the people who give it to me                                     | Medical benefits                                                                               | Not aware of any                                                                             | Wife                                                                  | Nobody                                                                   |
| Can be deadly, minimise your risk as much as possible                | Going to boost my immune system, contains 3 strains of flu, increase protection | Not going to cover 100% flu strains                                             | Some protection - feel as if you have done something to help yourself against something horrid | Occasional soreness in your arm                                                              | Spouse, other members of family                                       | No one I know                                                            |
| High temperature, wake up sweating                                   | Added substance                                                                 | I don't have the flu vaccine; I do know people who have had the flu vaccine who | To anybody who is susceptible to flu it's more preventative                                    | No opinion                                                                                   | Friend                                                                | Can't think of anyone                                                    |

| What do you know about seasonal flu infection?           | What do you know about the adjuvanted seasonal flu vaccine? | What concerns do you have about getting the adjuvanted seasonal flu vaccine? | Some of the good things about getting the adjuvanted seasonal flu | Some of the bad things about getting the adjuvanted seasonal flu | Who would approve of you getting the adjuvanted seasonal flu vaccine? | Who would disapprove of you getting the adjuvanted seasonal flu vaccine? |
|----------------------------------------------------------|-------------------------------------------------------------|------------------------------------------------------------------------------|-------------------------------------------------------------------|------------------------------------------------------------------|-----------------------------------------------------------------------|--------------------------------------------------------------------------|
|                                                          |                                                             | have been worse than previous                                                |                                                                   |                                                                  |                                                                       |                                                                          |
| It can be horrible                                       | Research based on the flu strains from the previous year    | I don't have any                                                             | Help my immune system respond                                     | None                                                             | Family                                                                | None                                                                     |
| Debilitating at any age but to be avoided as a pensioner | Nothing                                                     | No concerns                                                                  | Hopefully it keeps me from getting flu                            | None                                                             | Never discussed it with anybody                                       | I can't think of anybody who would disapprove                            |
| Puts you on your back                                    | Added substance                                             | None whatsoever                                                              | Not getting flu                                                   | Only bad thing is not having the vaccine                         | Friends, family, spouse                                               | Nobody                                                                   |
| It's bad - not something you want                        | Best to have it                                             | No concerns                                                                  | Prevents you from getting flu and colds probably                  | Arm can be a bit stiff, don't feel like doing much afterwards    | Friends, family                                                       | None                                                                     |
| Cause high temperature, headaches, feel lousy            | Prevent chest infections                                    | No concerns                                                                  | To prevent getting flu                                            | I can't think of any                                             | Wife and the staff/medical team at my surgery                         | I can't think of Any                                                     |
| Make you very ill and can kill people                    | Advisable to have it                                        | No concerns as I have had no reactions                                       | Easy to have it done and gives you peace of mind                  | I suppose some people can have a reaction                        | Friends and family                                                    | No                                                                       |
| Cold and shivery, weakness                               | Different strain this year - added something to it          | None - hopefully it works                                                    | Builds your immune system up                                      | Don't want a reaction                                            | Family/daughter in law                                                | Idiots on the television!!                                               |
| It can be dangerous and debilitating                     | Additive to help make the vaccine more effective            | No concerns                                                                  | If you do get flu it makes it a lighter flu than really bad       | Sore arm                                                         | Not their concern - it's mine                                         | It makes no difference to me - it's my decision                          |
| Changes yearly - alters its structure. Virus changes     | Increases/helps immunity                                    | None                                                                         | Don't get flu - stay healthy                                      | None - I've never had any problems                               | Family, doctor                                                        | None I can think of                                                      |
| I don't get it as I'm vaccinated against it              | I don't know a lot                                          | None really - it is all tested                                               | I can enjoy life and go on my holidays                            | None                                                             | Friends                                                               | None - can't think of any                                                |
| Makes people very unwell                                 | Nothing                                                     | None                                                                         | Prevents from getting flu                                         | None                                                             | Family                                                                | None                                                                     |
| Makes poorly high temperature and weak                   | Better for older people                                     | None                                                                         | Prevents from getting flu                                         | None                                                             | Friends and family                                                    | None                                                                     |

| What do you know about seasonal flu infection?                 | What do you know about the adjuvanted seasonal flu vaccine?     | What concerns do you have about getting the adjuvanted seasonal flu vaccine? | Some of the good things about getting the adjuvanted seasonal flu | Some of the bad things about getting the adjuvanted seasonal flu | Who would approve of you getting the adjuvanted seasonal flu vaccine? | Who would disapprove of you getting the adjuvanted seasonal flu vaccine?                        |
|----------------------------------------------------------------|-----------------------------------------------------------------|------------------------------------------------------------------------------|-------------------------------------------------------------------|------------------------------------------------------------------|-----------------------------------------------------------------------|-------------------------------------------------------------------------------------------------|
| Can be painful, can cause people to become bedbound            | Quite effective in my case                                      | Hoping it will be effective                                                  | Prevents ill health                                               | That it won't be effective                                       | My children                                                           | None                                                                                            |
| Every year can be a different strain                           | Takes two weeks to be fully effective                           | None                                                                         | Prevents people from getting flu                                  | None                                                             | Spouse and children                                                   | Some friends believe they have had flu following the vaccine, but have caught a different virus |
| Effects older people                                           | Different strains and more effective                            | None                                                                         | Reduces the risk of getting flu and gives people peace of mind    | None                                                             | Friends and colleagues                                                | None                                                                                            |
| Can cause high temperature and bedbound for a period           | Worked in my case                                               | None                                                                         | Prevents against getting flu                                      | None                                                             | Spouse, doctors                                                       | None                                                                                            |
| Stops from getting flu                                         | New strain because you can get immune to older strains          | None                                                                         | Hope I don't get flu                                              | None                                                             | Family and friends                                                    | None                                                                                            |
| Can increase stroke risk                                       | More important as you get older                                 | None                                                                         | Better response by stimulating immune system                      | None                                                             | Family                                                                | Some friends                                                                                    |
| Unwell, aching joints, can lead to pneumonia                   | Protects against flu                                            | None                                                                         | Makes feel more confident about going out                         | Nothing                                                          | Family and friends                                                    | None                                                                                            |
| Can cause pneumonia and be fatal in the elderly                | Recommended to the over 65s. Helps to support the immune system | None                                                                         | Strongly recommended by GP                                        | None                                                             | Family                                                                | Some friends                                                                                    |
| Effects older people more than the younger                     | Effective. Don't get side effects personally                    | None                                                                         | Less likely to cause flu                                          | None                                                             | Family and healthcare provider                                        | None                                                                                            |
| Seasonal Dec to March, at greater risk in crowded environments | Particularly important for over 65s as immune system            | None                                                                         | Helps protect against getting flu. The more people vaccinated the | None                                                             | Family                                                                | No                                                                                              |

| What do you know about seasonal flu infection?                                                                            | What do you know about the adjuvanted seasonal flu vaccine?             | What concerns do you have about getting the adjuvanted seasonal flu vaccine? | Some of the good things about getting the adjuvanted seasonal flu | Some of the bad things about getting the adjuvanted seasonal flu               | Who would approve of you getting the adjuvanted seasonal flu vaccine? | Who would disapprove of you getting the adjuvanted seasonal flu vaccine? |
|---------------------------------------------------------------------------------------------------------------------------|-------------------------------------------------------------------------|------------------------------------------------------------------------------|-------------------------------------------------------------------|--------------------------------------------------------------------------------|-----------------------------------------------------------------------|--------------------------------------------------------------------------|
|                                                                                                                           | effectiveness decreases with age                                        |                                                                              | reduction in the spread of flu                                    |                                                                                |                                                                       |                                                                          |
| Different strains. Seasonal in winter, increased risk to exposure in crowded areas ie. buses. Can make people very unwell | Different strains and different vaccines depending on people's immunity | None                                                                         | More confident that no putting self at more risk                  | Misunderstanding that can cause flu but hasn't stopped me from getting vaccine | Spouse and family, daughter is a doctor                               | Some friends                                                             |
| It can be very dangerous, deadly                                                                                          | Better protection, specific for my age                                  | None                                                                         | It's a good thing to have                                         | None                                                                           | Family, friends                                                       | None                                                                     |
| Ex nurse so aware of implications of flu                                                                                  | 3 strains, dead virus, side effects                                     | No concerns                                                                  | Not getting the flu                                               | Possible side effects                                                          | Doctors                                                               | Nobody                                                                   |
| Helpful, comprehensive                                                                                                    | I didn't know it existed until today                                    | Don't want it, side effects                                                  | Can't think of any                                                | Adverse reaction                                                               | Nobody has really mentioned it                                        | Son and daughter in law                                                  |
| What HCP has just said                                                                                                    | What HCP has just said                                                  | None                                                                         | Peace of mind                                                     | None                                                                           | Health professionals, daughter                                        | None believers, spouse                                                   |
| Don't know                                                                                                                | Nothing                                                                 | Anti-needles. Never had flu                                                  | Prevent death. May stop me getting flu                            | Arm sore for 4 days, needles                                                   | Spouse and family                                                     | Probably nobody                                                          |
| [Nothing written]                                                                                                         | It's different. 3 strains                                               | No concerns                                                                  | Not as ill if you have the flu vaccine                            | No comment                                                                     | Medical, family, in general people                                    | The moaners, people who are negative about it                            |
| Likely to be admitted to hospital. Less independent after having flu                                                      | Better vaccine for over 65. It's safe. Mild side effects                | None                                                                         | Not getting flu                                                   | None                                                                           | Family                                                                | Nobody                                                                   |
| Reduces the risk of flu                                                                                                   | 3 strains                                                               | None                                                                         | Effective                                                         | None                                                                           | Anyone except my wife                                                 | Spouse                                                                   |
| Not pleasant. Have to take to your bed. Long time to get over it                                                          | Advertisement. What HCP tells me                                        | None                                                                         | Don't get flu                                                     | None, never had side effects                                                   | Family, HCPs                                                          | Daughters mother in law!                                                 |
| More healthcare needed after flu infection, increased risk of heart problems,                                             | DN informed me, better, broader protection                              | None                                                                         | Haven't had any flu symptoms since having flu vaccine             | No effects                                                                     | Family                                                                | Elderly - those that don't want it                                       |

| What do you know about seasonal flu infection?                                          | What do you know about the adjuvanted seasonal flu vaccine?                                                | What concerns do you have about getting the adjuvanted seasonal flu vaccine? | Some of the good things about getting the adjuvanted seasonal flu         | Some of the bad things about getting the adjuvanted seasonal flu         | Who would approve of you getting the adjuvanted seasonal flu vaccine? | Who would disapprove of you getting the adjuvanted seasonal flu vaccine? |
|-----------------------------------------------------------------------------------------|------------------------------------------------------------------------------------------------------------|------------------------------------------------------------------------------|---------------------------------------------------------------------------|--------------------------------------------------------------------------|-----------------------------------------------------------------------|--------------------------------------------------------------------------|
| possible hospital admission                                                             |                                                                                                            |                                                                              |                                                                           |                                                                          |                                                                       |                                                                          |
| 3 strains. Dead strains                                                                 | What I've been told, better protection                                                                     | None                                                                         | It's better for me, I have COPD so need it                                | Nothing really, I get side effects but they wear off in a few days       | Doctor, family                                                        | Homeopathic believers                                                    |
| It can be nasty                                                                         | 3 strains. For over 65s                                                                                    | None                                                                         | It works                                                                  | None                                                                     | Everyone                                                              | No one                                                                   |
| 3 strains. Dead strains                                                                 | It's safe. It provides better protection                                                                   | Not really                                                                   | Reduced risk of flu                                                       | Nothing really                                                           | Family and friends                                                    | Homeopathic believers                                                    |
| It can have damaging implications if infected                                           | It provides greater protection                                                                             | None                                                                         | Beneficial. Worth having                                                  | Nothing                                                                  | Everyone                                                              | No one                                                                   |
| It can be dangerous, life threatening. Could mean I'm in hospital                       | Better protection                                                                                          | None, a bit uncomfortable                                                    | Reduces flu risk, important                                               | Uncomfortable                                                            | Family                                                                | Nobody, I wouldn't listen to anyone's opinion                            |
| Nothing really                                                                          | Nothing, I will have it regardless                                                                         | None, its important I have it                                                | Effective                                                                 | [Nothing written]                                                        | [Nothing written]                                                     | Nothing                                                                  |
| Very ill, last thing you want if it can be avoided                                      | 3 strains. Effective, recommended                                                                          | Nothing                                                                      | Stops me getting flu                                                      | Not that I can think of. Not heard of anyone having an allergic reaction | Near relatives                                                        | No one                                                                   |
| [Nothing written]                                                                       | 3 strains                                                                                                  | None                                                                         | Stop me getting flu                                                       | Nothing                                                                  | Friends, never discussed with anyone                                  | No one                                                                   |
| If you have other conditions and >65 yrs it can be very serious and cause complications | Better injection to protect me from various strains of the flu virus                                       | None                                                                         | I believe/read that I only need to have this injection once in a lifetime | None                                                                     | Spouse/family/children                                                | None                                                                     |
| More likely in the winter                                                               | Not a lot. I understand the powers at be struggle to decide which strains to use to protect the population | None                                                                         | Protection is great                                                       | None                                                                     | Family and friends                                                    | None                                                                     |
| NAD                                                                                     | Not interested. Trust GP and nurse                                                                         | None                                                                         | I am informed by my nurse that it is the best                             | None                                                                     | None                                                                  | None                                                                     |



| What do you know about seasonal flu infection?                                       | What do you know about the adjuvanted seasonal flu vaccine?            | What concerns do you have about getting the adjuvanted seasonal flu vaccine? | Some of the good things about getting the adjuvanted seasonal flu                                                  | Some of the bad things about getting the adjuvanted seasonal flu | Who would approve of you getting the adjuvanted seasonal flu vaccine? | Who would disapprove of you getting the adjuvanted seasonal flu vaccine? |
|--------------------------------------------------------------------------------------|------------------------------------------------------------------------|------------------------------------------------------------------------------|--------------------------------------------------------------------------------------------------------------------|------------------------------------------------------------------|-----------------------------------------------------------------------|--------------------------------------------------------------------------|
|                                                                                      |                                                                        |                                                                              | vaccine available to protect me this year                                                                          |                                                                  |                                                                       |                                                                          |
| Not a thing                                                                          | Not a thing                                                            | None                                                                         | Stops the spread of flu                                                                                            | None                                                             | No input                                                              | None                                                                     |
| Can be very serious. Can easily be passed to others                                  | Should help to avoid catching flu therefore reduce number of sufferers | None                                                                         | Peace of mind that hopefully I will be free of symptoms                                                            | ? Any side effects                                               | Spouse and children                                                   | None                                                                     |
| Can have serious consequences including death, particularly among the elderly        | Limited knowledge, but trust that it is beneficial                     | None                                                                         | Additional protection for more strains of flu                                                                      | None known                                                       | Spouse, children and friends                                          | None                                                                     |
| Can be very serious for older people                                                 | Supposed to be latest and best as it covers more types of flu          | Hope that it is as effective as the other one has been for me                | [Nothing written]                                                                                                  | [Nothing written]                                                | [Nothing written]                                                     | [Nothing written]                                                        |
| Very little                                                                          | Better for the older person aged >65 yrs                               | None                                                                         | Extra protection if aged 65 or over                                                                                | None                                                             | Family                                                                | None                                                                     |
| Not a lot                                                                            | Best vaccine for age group >65yrs                                      | None                                                                         | Reduce risk of getting virus so the health professionals tell me                                                   | None                                                             | Family and friends                                                    | None                                                                     |
| Different strains                                                                    | For the over 65s                                                       | None                                                                         | It protects the >65's better                                                                                       | None                                                             | Friends and family                                                    | None                                                                     |
| It affects anyone at any age                                                         | It's the best for >65yrs                                               | No concerns                                                                  | Protects me and my family                                                                                          | None                                                             | GP family - grandchildren                                             | None                                                                     |
| It can be dangerous for some groups of people, especially the elderly and very young | Provides resistance against some flu types                             | None                                                                         | It's free. Little after effects. Provides some protection against flu infection, especially as I'm 69 years of age | I don't know any                                                 | Spouse/friends/family/GP practice                                     | I don't know of any                                                      |
| Nothing                                                                              | Best protection for >65yrs                                             | None                                                                         | Best coverage                                                                                                      | None                                                             | Family and friends                                                    | None                                                                     |
| Various strains                                                                      | Best vaccine for >65yrs                                                | None                                                                         | Best protection for my age group                                                                                   | None                                                             | None                                                                  | None                                                                     |
| The vaccine covers the strains of flu deemed                                         | Nothing                                                                | No concerns at all                                                           | Hopefully protects me from contracting the                                                                         | Can't think of any                                               | Spouse                                                                | None                                                                     |

| What do you know about seasonal flu infection?                                                          | What do you know about the adjuvanted seasonal flu vaccine?          | What concerns do you have about getting the adjuvanted seasonal flu vaccine? | Some of the good things about getting the adjuvanted seasonal flu                | Some of the bad things about getting the adjuvanted seasonal flu | Who would approve of you getting the adjuvanted seasonal flu vaccine? | Who would disapprove of you getting the adjuvanted seasonal flu vaccine? |
|---------------------------------------------------------------------------------------------------------|----------------------------------------------------------------------|------------------------------------------------------------------------------|----------------------------------------------------------------------------------|------------------------------------------------------------------|-----------------------------------------------------------------------|--------------------------------------------------------------------------|
| to be a problem this season. Seasonal flu can be very dangerous for certain age groups and can be fatal |                                                                      |                                                                              | flu virus. It is painless and free                                               |                                                                  |                                                                       |                                                                          |
| Can be devastating                                                                                      | Boosts the immune system, as immune system weaker                    | None                                                                         | Never get a cold!                                                                | No trouble with it                                               | GP, nurse, husband                                                    | None                                                                     |
| Flu can lead to death, runs you down for weeks. Makes you feel so weak and unwell                       | Combination of 3 strains of flu, injected with dead cells            | None                                                                         | Relief knowing I'm protected, takes the worry away because I'm vaccinated        | None                                                             | Everybody around me                                                   | No                                                                       |
| Devastating - you feel like you won't survive                                                           | Extra to boost my immune response to the vaccine                     | None                                                                         | Protected                                                                        | No                                                               | Family, friends                                                       | Have heard people say not too                                            |
| It kills, makes you feel very very unwell, safeguarding me for the year                                 | Contains something to boost immune - I accept the advice given to me | No I don't                                                                   | Safeguards for the year, confidence that you are doing your best to stay healthy | Can have swelling and soreness                                   | Friends, family - people who care about me                            | No                                                                       |
| Is not pleasant                                                                                         | Know that I'm protected better                                       | No                                                                           | Peace of mind - I've done all I can                                              | No                                                               | GP, family                                                            | No                                                                       |
| [Nothing written]                                                                                       | Contains an ingredient to boost my response                          | None                                                                         | Protects me, boosts my immune system                                             | None                                                             | Family, GP, work                                                      | None                                                                     |
| Not very nice                                                                                           | I know a lot more - it's really protection. I would not turn it down | Not now                                                                      | Stops even colds                                                                 | None                                                             | Family, friends                                                       | No - I don't listen to people                                            |
| Makes you sick and unwell                                                                               | Because I am older my immune system needs a boost                    | Not worried                                                                  | I won't get ill                                                                  | If it makes you feel unwell                                      | Friends, pharmacist, doctors and nurses                               | None                                                                     |
| Occurs every year                                                                                       | Contains oil to help my immune response                              | None                                                                         | Protects me                                                                      | Its individual responses                                         | Daughter, doctor, nurses, friends                                     | A friend                                                                 |

| What do you know about seasonal flu infection?                                                                                                                                    | What do you know about the adjuvanted seasonal flu vaccine?                                                                                      | What concerns do you have about getting the adjuvanted seasonal flu vaccine?                                                                                         | Some of the good things about getting the adjuvanted seasonal flu                                                             | Some of the bad things about getting the adjuvanted seasonal flu                                                                                                                                                     | Who would approve of you getting the adjuvanted seasonal flu vaccine? | Who would disapprove of you getting the adjuvanted seasonal flu vaccine? |
|-----------------------------------------------------------------------------------------------------------------------------------------------------------------------------------|--------------------------------------------------------------------------------------------------------------------------------------------------|----------------------------------------------------------------------------------------------------------------------------------------------------------------------|-------------------------------------------------------------------------------------------------------------------------------|----------------------------------------------------------------------------------------------------------------------------------------------------------------------------------------------------------------------|-----------------------------------------------------------------------|--------------------------------------------------------------------------|
| Varies from mild symptoms to life changing symptoms. Knew about 1918 pandemic more than WWI people died. Mutates year by year various strains and vaccine changes to reflect that | Was not aware of the difference to other vaccine. Not aware that its booster additive was the extra bit                                          | Very mild concerns - got risks but they are low especially compared to effects of flu if you get it                                                                  | Less likely to get flu                                                                                                        | They have a reaction. Something arm [illegible] ranging from minor to serious most would be minor                                                                                                                    | Family                                                                | None                                                                     |
| Aware of symptom but reinforced that now. Importance of 65yr old to get best protection available                                                                                 | Not new vaccine. Know huge number doses given in Europe. Know it exists now                                                                      | Following first treatment I had 4 cases of flu followed by sepsis. 6/12 off work and a very difficult period of recovery. Is this coincidence or related to vaccine? | Give immune system a boost                                                                                                    | The uncertainty of not knowing if related to my flu experience. I have never been this poorly after a flu vaccine before. [Illegible] did not work. Including difficult every time in hospital treatment [illegible] | Immediate family. Myself                                              | None                                                                     |
| Could lead to stroke and heart attack. Did not know 15,000 died in 2017. Did not know I had to have 2 weeks before effective                                                      | Adjuvant will carry it now to every cell in the body                                                                                             | None                                                                                                                                                                 | More effective in over 65yrs                                                                                                  | No. Some people say it makes them ill                                                                                                                                                                                | Daughter and partner                                                  | None                                                                     |
| Can kill a lot of old people, especially if other health condition. Did not know it could lead to heart attacks or strokes. Did know your immune system                           | Boosts the immune system makes vaccine more effective. It's never going to give you flu. Especially important if you have other health condition | None really                                                                                                                                                          | Slightly more effective for older people as immune system weakens. Help prevent complication such as stroke and heart problem | None                                                                                                                                                                                                                 | Husband, people I work and socialise with                             | None                                                                     |

| What do you know about seasonal flu infection?                                                                                      | What do you know about the adjuvanted seasonal flu vaccine?                                                                               | What concerns do you have about getting the adjuvanted seasonal flu vaccine?       | Some of the good things about getting the adjuvanted seasonal flu           | Some of the bad things about getting the adjuvanted seasonal flu               | Who would approve of you getting the adjuvanted seasonal flu vaccine? | Who would disapprove of you getting the adjuvanted seasonal flu vaccine? |
|-------------------------------------------------------------------------------------------------------------------------------------|-------------------------------------------------------------------------------------------------------------------------------------------|------------------------------------------------------------------------------------|-----------------------------------------------------------------------------|--------------------------------------------------------------------------------|-----------------------------------------------------------------------|--------------------------------------------------------------------------|
| lessens as you get older                                                                                                            |                                                                                                                                           |                                                                                    |                                                                             |                                                                                |                                                                       |                                                                          |
| Changes every year. Know how they decide on flu strains. Know had bad flu can be. It's not a bad cold - very debilitating           | Designed to help over 65yrs. With age immune system deteriorates. Most people should have it unless allergies. I will continue to have it | With any vaccine there is always a concern about reactions but no more than normal | Peace of mind - less likely to get flu. Not passing onto others             | Apart from some side effects no downside                                       | Anyone who has thought it through. Friends, family                    | People who have a problem with vaccines                                  |
| Need to have asthma and heart trouble etc can kill you                                                                              | Did not know it was new vaccine                                                                                                           | None                                                                               | I didn't notice any difference. Should be more effective                    | No                                                                             | Doctor, family                                                        | None. 1 friend doesn't have it - thinks it gives him flu                 |
| Same as before - makes you feel ill. If you have other illness it can make them worse                                               | More effective than the older vaccine. Can [illegible] specific types of flu                                                              | Could get flu afterwards but this is probably wrong                                | Quicker actually, gives greater protection than previous vaccine            | None that I can think of                                                       | Immediate family                                                      | None                                                                     |
| Surprised by length of time it lasts thought lasts longer. Can make you depressed                                                   | Spread better around the body                                                                                                             | No concerns                                                                        | Seems to work better for older people                                       | No don't think so                                                              | Family                                                                | None                                                                     |
| It's a virus that can change so now come up with an added liquid that is added to normal vaccine, this will help people not get flu | Thought completely new vaccine, did not know had something added to normal vaccine to make it work better                                 | No concerns, already had flu free year                                             | Felt better this winter than last winter. Works well. Improvement good news | It's had 87 million doses so no bad things or they would have been seen by now | Wife, brother                                                         | No one                                                                   |
| Worse than I thought. Can put you on your back. Proper flu terrible, makes you weak                                                 | Essential you get it, especially people with chest problem. Its more effective                                                            | None                                                                               | Prevent me from being at risk of catching flu, keep me well                 | None                                                                           | Family, friends, doctor                                               | None                                                                     |

| What do you know about seasonal flu infection?                                                                                                      | What do you know about the adjuvanted seasonal flu vaccine?                                                                        | What concerns do you have about getting the adjuvanted seasonal flu vaccine? | Some of the good things about getting the adjuvanted seasonal flu                        | Some of the bad things about getting the adjuvanted seasonal flu | Who would approve of you getting the adjuvanted seasonal flu vaccine?              | Who would disapprove of you getting the adjuvanted seasonal flu vaccine?              |
|-----------------------------------------------------------------------------------------------------------------------------------------------------|------------------------------------------------------------------------------------------------------------------------------------|------------------------------------------------------------------------------|------------------------------------------------------------------------------------------|------------------------------------------------------------------|------------------------------------------------------------------------------------|---------------------------------------------------------------------------------------|
| Potentially dangerous, very expensive to NHS                                                                                                        | Reasonable effectiveness at doing it jobs. More effective than previous model, spread around body better to increase effectiveness | Needle phobia, needle phobic                                                 | Decreases risk of getting flu                                                            | Not that I know of                                               | Everybody I know, sister in law especially - she has paid for it for several years | None                                                                                  |
| Can be life threatening. Can cause extra heart problems                                                                                             | If successful hospital will have less elderly patient. That's all                                                                  | None                                                                         | Hopefully keep me fit, sounds promising                                                  | Nothing                                                          | Husband and mother                                                                 | No one                                                                                |
| Incapacitating plus carry risk of complication such as stroke or heart attacks. Lots of complication in the over 65yr immune system works less well | Very good idea should have had this years ago. Gives extra push round the system to make it work better                            | None it's been in Europe long enough. If any problem it would not be used    | No problem, don't worry about the flu. I have had no effects, far as I know it's been ok | None                                                             | Family, friends in the nursing profession                                          | People that don't like injections, don't believe it's good for your health            |
| Killed a lot after WWI. Didn't that it was still a killer. Can exacerbate other condition i.e., COPD                                                | Different flu vaccine, only for over 65yrs                                                                                         | None                                                                         | Good if it prevents you getting flu                                                      | None                                                             | Doctors etc                                                                        | None                                                                                  |
| Puts you on your back if real flu and not just a bad cold                                                                                           | Spread through the body quicker                                                                                                    | No none                                                                      | If it stops me getting flu that the best thing                                           | No bad things                                                    | Family and friends                                                                 | Sister something doesn't have it and she is not bothered, doesn't bother with vaccine |
| Learned that it can cause permanent debilitation especially in older people. Infection may last 1                                                   | Same as old vaccine but added adjuvant that spreads it around body getting it to all parts. Adjuvant is just an aid                | None                                                                         | Anything that improves function of vaccine must be commended                             | None - sometime arm may be sore but I didn't have that problem   | Family, golf club friends, friends, neighbours                                     | None                                                                                  |

| What do you know about seasonal flu infection?                                                                                                                      | What do you know about the adjuvanted seasonal flu vaccine?                                              | What concerns do you have about getting the adjuvanted seasonal flu vaccine?      | Some of the good things about getting the adjuvanted seasonal flu                            | Some of the bad things about getting the adjuvanted seasonal flu               | Who would approve of you getting the adjuvanted seasonal flu vaccine? | Who would disapprove of you getting the adjuvanted seasonal flu vaccine? |
|---------------------------------------------------------------------------------------------------------------------------------------------------------------------|----------------------------------------------------------------------------------------------------------|-----------------------------------------------------------------------------------|----------------------------------------------------------------------------------------------|--------------------------------------------------------------------------------|-----------------------------------------------------------------------|--------------------------------------------------------------------------|
| week but recovery much longer                                                                                                                                       |                                                                                                          |                                                                                   |                                                                                              |                                                                                |                                                                       |                                                                          |
| How long since last outbreak, can kill you                                                                                                                          | Vaccine can save lives, advise others to have it I am still not sure myself                              | Will it affect my COPD and heart condition, will it affect me long term           | New vaccine with extra chemicals, good use in Europe and they always need to improve vaccine | Will it affect my other health problems and medication so very wary to take it | Son                                                                   | Some friends say not to have it                                          |
| Now know many people with flu end up in hospital. Flu can have devastating effects                                                                                  | Feel the adjuvanted flu vaccine more effective than the usual flu vac                                    | Only concern would be having shoulder problem following the flu vac given in 2017 | Distributes it around the body in a more effective way                                       | Don't know of any                                                              | Children, my son. Friends                                             | None                                                                     |
| More serious than I had previously thought. Not aware of the impact of flu on a range of health aspects e.g., Flu on top of diabetes or COPD, will make these worse | Takes account of WHO information. The delivery of the vaccine to bloodstream is enhanced by the adjuvant | Nothing                                                                           | Most important it reassures me that I am protected from the impact of flu protection         | Not aware of any                                                               | Everyone who care about me - family and close friends                 | Not at all in my circle                                                  |
| Nothing new from previous question                                                                                                                                  | A lot better than old vaccine, better response to vaccine                                                | No concerns                                                                       | Not a lot different but sounds better                                                        | Nothing                                                                        | None                                                                  | None                                                                     |
| Still got flu after having vaccine. What I said before basically                                                                                                    | Helps it spread around the body, good for weaker immune systems                                          | I react badly to some medication combinations                                     | Back to last question - supposed to spread around body better                                | Something other than usual flu vaccine for body to cope with                   | Medical professional, family                                          | None                                                                     |
| Very debilitating and capable of killing you                                                                                                                        | It has a [illegible] in it to help elderly people pick it up better                                      | I have no concern                                                                 | For older people helps make sure I am getting benefits of the vaccine                        | Not that I am aware of                                                         | Family                                                                | No one                                                                   |
| Can kill, effects over 65 more than younger ones                                                                                                                    | Extra, added constituent to flu vac                                                                      | No concern                                                                        | Extra protection if aged 65 or over                                                          | Not that I know of                                                             | Medical people in my family, my own GP                                | None                                                                     |

| What do you know about seasonal flu infection?                                                                                   | What do you know about the adjuvanted seasonal flu vaccine?                                         | What concerns do you have about getting the adjuvanted seasonal flu vaccine? | Some of the good things about getting the adjuvanted seasonal flu | Some of the bad things about getting the adjuvanted seasonal flu | Who would approve of you getting the adjuvanted seasonal flu vaccine? | Who would disapprove of you getting the adjuvanted seasonal flu vaccine? |
|----------------------------------------------------------------------------------------------------------------------------------|-----------------------------------------------------------------------------------------------------|------------------------------------------------------------------------------|-------------------------------------------------------------------|------------------------------------------------------------------|-----------------------------------------------------------------------|--------------------------------------------------------------------------|
|                                                                                                                                  | that keeps vaccine work more effectively                                                            |                                                                              |                                                                   |                                                                  |                                                                       |                                                                          |
| Not a lot                                                                                                                        | Very effective                                                                                      | None                                                                         | Prevents most types of flu                                        | Sometimes a red area                                             | Family                                                                | None                                                                     |
| Two vaccines in one as extra protection. Oil enhances immune system. May have red mark at injection site                         | Designed for adults over 65 yrs                                                                     | Nothing as it's not a live vaccine                                           | Protect my immune systems                                         | May have inflamed patch at injection site                        | People whose immune system is not good, elderly with chest problems   | Certain groups who do not believe in vaccines                            |
| Very unpleasant can be dangerous                                                                                                 | Natural oil added to enhance the immune system                                                      | None                                                                         | No reaction to it                                                 | None                                                             | Family                                                                | None                                                                     |
| It is a prevention measure to avoid flu infection                                                                                | Did the job                                                                                         | None                                                                         | To prevent clinical infection of flu                              | Natural reluctance                                               | Family and friends                                                    | The negatives                                                            |
| [Nothing written]                                                                                                                | [Nothing written]                                                                                   | None!                                                                        | Not being extremely ill in the winter                             | Don't know of any!                                               | Family and friends                                                    | None!                                                                    |
| Not a lot                                                                                                                        | Nothing other than information provided by nurse                                                    | None                                                                         | Hopefully to stay clear of infection                              | None known                                                       | Spouse, children and friends                                          | None known                                                               |
| It is a new vaccine for over 65' and other vulnerable groups. It is not curable. Benefits gained by vaccination and good hygiene | It is a new vaccine that protects against 4 strains but especially effective with two in particular | None                                                                         | Own health, less strain on the NHS                                | Can't think of any, apart from possible mild side effects        | Spouse, family, NHS                                                   | Nil                                                                      |
| Can be serious infection for elderly and those with chest problems e.g., asthma                                                  | Contains 4 strains of vaccine and natural oil to enhance immune system                              | None                                                                         | Avoid getting flu                                                 | None                                                             | Family                                                                | No one who should be concerned about my health                           |
| Be in hospital if I did not have it                                                                                              | 4 strains, natural oil to enhance my immune system                                                  | None                                                                         | Stop me going to hospital and being very ill                      | None                                                             | Husband, family and health workers                                    | None                                                                     |

| What do you know about seasonal flu infection?                                                                                                                                              | What do you know about the adjuvanted seasonal flu vaccine?                                                     | What concerns do you have about getting the adjuvanted seasonal flu vaccine? | Some of the good things about getting the adjuvanted seasonal flu                    | Some of the bad things about getting the adjuvanted seasonal flu                      | Who would approve of you getting the adjuvanted seasonal flu vaccine? | Who would disapprove of you getting the adjuvanted seasonal flu vaccine?       |
|---------------------------------------------------------------------------------------------------------------------------------------------------------------------------------------------|-----------------------------------------------------------------------------------------------------------------|------------------------------------------------------------------------------|--------------------------------------------------------------------------------------|---------------------------------------------------------------------------------------|-----------------------------------------------------------------------|--------------------------------------------------------------------------------|
| Very debilitating - knocks you out completely for at least 2 weeks                                                                                                                          | Apparently it has 4 strains which covers all aspects of the expected virus                                      | None really - maybe a little discomfort from the actual injection            | You don't contract flu!                                                              | Slight redness on my arm. Felt a little under the weather for a couple of weeks       | Husband (definitely), children, mother                                | Nobody - I make my own decision                                                |
| Occurs every year                                                                                                                                                                           | Improvement on previous years                                                                                   | None                                                                         | Free of flu                                                                          | None so far                                                                           | Spouse/friends                                                        | None                                                                           |
| Can be spread easily so important to get flu jab                                                                                                                                            | Not sure what this means. Now understand this makes it work better                                              | None                                                                         | Anything which prevents flu is great                                                 | No                                                                                    | All relations and friends                                             | None I hope                                                                    |
| Easily caught, get very poorly                                                                                                                                                              | Natural oil added to it, not a live vaccine                                                                     | No                                                                           | It might strain help me avoid having flu                                             | None                                                                                  | None                                                                  | Husband                                                                        |
| It is an unpleasant disease to catch and may cause severe problems, even death, for the elderly                                                                                             | It is not a live vaccine and contains an oil to aid the effect i.e., to prevent catching various strains of flu | None - just a slight worry that it will hurt                                 | It has stopped me getting flu                                                        | None really - except the slight discomfort of the injection and slight brief soreness | Family and husband if they bother to think about it                   | I can't think that anyone would worry about me be vaccinated to stop being ill |
| More aware now than in earlier days                                                                                                                                                         | That it protects against the most likely/common strains                                                         | None                                                                         | Easily administered - in my case no discernable after effects                        | None                                                                                  | Spouse                                                                | None that I can identify                                                       |
| Very little                                                                                                                                                                                 | Very little                                                                                                     | None                                                                         | Hopefully do not get flu                                                             | Nothing                                                                               | Family                                                                | No one to my knowledge                                                         |
| The flu infection tends to occur in early to late autumn and is transmitted via air droplets from sneezing or by physical contact. The seasonal flu can be particularly bad for the elderly | It is transferred towards the elderly. It is not a live vaccine                                                 | None having been assured it was not 'live'                                   | Very simple to get, painless, and provided peace of mind. Did not have any reactions | None                                                                                  | Spouse and other family members                                       | None                                                                           |



| What do you know about seasonal flu infection?                                             | What do you know about the adjuvanted seasonal flu vaccine?                                                  | What concerns do you have about getting the adjuvanted seasonal flu vaccine?       | Some of the good things about getting the adjuvanted seasonal flu                 | Some of the bad things about getting the adjuvanted seasonal flu | Who would approve of you getting the adjuvanted seasonal flu vaccine?                | Who would disapprove of you getting the adjuvanted seasonal flu vaccine? |
|--------------------------------------------------------------------------------------------|--------------------------------------------------------------------------------------------------------------|------------------------------------------------------------------------------------|-----------------------------------------------------------------------------------|------------------------------------------------------------------|--------------------------------------------------------------------------------------|--------------------------------------------------------------------------|
| Sensible thing to do considering age of 68                                                 | Designed for my age group                                                                                    | None                                                                               | Reducing risk of flu                                                              | No known 'bad things'                                            | Family and friends who have received flu vaccine                                     | None                                                                     |
| This year it targets at least 2 strains and it has kept me pretty much flu free all winter | It has this year got a natural oil in it which has to be good and left me with no reaction                   | None                                                                               | Peace of mind, it has to be [illegible] medical history                           | It may not cover every strain of flu                             | Nurse, doctors, husband, some friends and pharmacist                                 | A few sceptical friends                                                  |
| Make you poorly                                                                            | Natural oil to make it work better                                                                           | No concerns                                                                        | Stop you from being ill                                                           | No bad things about it                                           | Husband and family                                                                   | Nobody disapproves                                                       |
| Makes you very ill, incapacitated, bed bound for long period                               | Helps over 65 dose more effective                                                                            | None                                                                               | No flu, less chances of getting flu                                               | Sore arm                                                         | Older friends, family                                                                | None                                                                     |
| Each year as I age it can be a worry as I have other symptoms that might be exaggerated    | After this discussion I feel I know more about the reasons for the over 65 being given an adjuvanted vaccine | None                                                                               | A feeling of confidence during the winter                                         | None                                                             | Everybody I meet outside the home can be confident that I don't/won't spread the flu | None                                                                     |
| High temp, shivers, aches, lasts 7-10 days, feel very unwell, potential chest infection    | Special additive for over 65yrs so we absorb it better. To give better protection                            | No                                                                                 | Peace of mind. Feel I have done all I can to avoid flu and reduce pressure on NHS | No                                                               | Family, grandchildren                                                                | None                                                                     |
| Know that it occurs and can have a variety of types (strains), can be very debilitating    | Not a HVE vaccine, safe, limited physical impact                                                             | Only to know that vaccine is relevant to anticipated strain of flu (minor concern) | Possible protection from flu, comfort of knowing that I have done all I can do    | None (in my case)                                                | Medical profession, family (wife especially)                                         | None                                                                     |
| Nasty infection, most prevalent in winter months                                           | Over 65 version                                                                                              | None                                                                               | Hopefully, one remains healthy                                                    | None                                                             | Family and friends                                                                   | None                                                                     |
| What I read in media                                                                       | Designed for 65+                                                                                             | No                                                                                 | Peace of mind                                                                     | Not sure                                                         | Family                                                                               | Not sure                                                                 |
| Much more than a cold - prevents normal everyday life activity -                           | This gets absorbs quicker in elderly people so helpful                                                       | None                                                                               | Hopefully will be more effective                                                  | None                                                             | Family                                                                               | None                                                                     |

| What do you know about seasonal flu infection?                      | What do you know about the adjuvanted seasonal flu vaccine?                   | What concerns do you have about getting the adjuvanted seasonal flu vaccine? | Some of the good things about getting the adjuvanted seasonal flu                      | Some of the bad things about getting the adjuvanted seasonal flu | Who would approve of you getting the adjuvanted seasonal flu vaccine? | Who would disapprove of you getting the adjuvanted seasonal flu vaccine? |
|---------------------------------------------------------------------|-------------------------------------------------------------------------------|------------------------------------------------------------------------------|----------------------------------------------------------------------------------------|------------------------------------------------------------------|-----------------------------------------------------------------------|--------------------------------------------------------------------------|
| become weak and bedridden with temp etc                             |                                                                               |                                                                              |                                                                                        |                                                                  |                                                                       |                                                                          |
| Very serious illness. Grandfather died of it                        | Specially designed for the over 65yrs                                         | No                                                                           | Stops me getting flu                                                                   | No                                                               | Anybody with any sense                                                | People who may have had a reaction                                       |
| Serious illness                                                     | Specially designed for over 65s to increase immunity                          | None                                                                         | Anything to reduce incidence for getting flu is a good thing                           | No                                                               | Anybody with sense                                                    | IDIOTS                                                                   |
| A very unpleasant experience                                        | It contains an additive to assist better take up in older people              | None - so far!                                                               | Hopefully provides better protection than other vaccines                               | Unaware of any as yet                                            | Family, friends                                                       | None as far as I know                                                    |
| Worse for people with other medical problems                        | Some side effects for some people                                             | Some side effects for some people                                            | Only if you have other problems                                                        | Potential side effects                                           | NHS                                                                   | None                                                                     |
| Some seasons can be worse than others. Real flu can be debilitating | It's specially designed for over 65's                                         | None                                                                         | Feeling protected                                                                      | Sore arm only                                                    | My GP practice would approve                                          | NONE                                                                     |
| Very serious illness. As previous answer                            | Have it at the beginning of the flu season. Specially designed for over 65yrs | No                                                                           | Peace of mind                                                                          | No                                                               | Family                                                                | The undertaker                                                           |
| Can cause very bad health issue                                     | It has an oil in it to help disperse the vaccine throughout the body          | Nil                                                                          | It is more easily absorbed into the body and give very good protection against the flu | Nil                                                              | Medical staff, family                                                 | No                                                                       |
| Having flu is very bad for you                                      | It protects me from flu                                                       | No concerns                                                                  | Protect against flu                                                                    | No                                                               | Family, medical centre staff                                          | No                                                                       |
| Can impact heart health if over 65 more than if younger             | Specifically designed for over 65's                                           | None                                                                         | Prevent flu to protect health                                                          | None                                                             | Family                                                                | None that I can think of                                                 |

| What do you know about seasonal flu infection?                                            | What do you know about the adjuvanted seasonal flu vaccine? | What concerns do you have about getting the adjuvanted seasonal flu vaccine? | Some of the good things about getting the adjuvanted seasonal flu | Some of the bad things about getting the adjuvanted seasonal flu | Who would approve of you getting the adjuvanted seasonal flu vaccine? | Who would disapprove of you getting the adjuvanted seasonal flu vaccine? |
|-------------------------------------------------------------------------------------------|-------------------------------------------------------------|------------------------------------------------------------------------------|-------------------------------------------------------------------|------------------------------------------------------------------|-----------------------------------------------------------------------|--------------------------------------------------------------------------|
| It confines you to bed and is very unpleasant                                             | Doesn't have many after effects. Seemed fairly innocuous    | Possibility of reactions                                                     | Don't get flu                                                     | You have to appear/wait (possible after effects                  | Spouse                                                                | No. My business!                                                         |
| As before                                                                                 | Specially designed for 65yrs. Designed to increase immunity | No                                                                           | Peace of mind                                                     | None                                                             | Family                                                                | None                                                                     |
| It very bad and makes you very ill                                                        | Slightly different for over 65yrs old                       | No                                                                           | Have not had flu                                                  | No                                                               | Family and friends                                                    | No                                                                       |
| Makes you very unwell. Terrible aches and pains and shivers, bedridden, worse than a cold | Slightly different vaccine that improves absorption         | None at all                                                                  | Hopefully protect me from getting flu                             | None                                                             | Family                                                                | None                                                                     |
